# Supplementary material for: Global projections of aridity index for mid and long-term future based on CMIP6 scenarios
Source: Copernicus journal article supplement (doi:10.5194/egusphere-2024-3710), 2025-01-24

# S1. Map of aridity categories for reference period 1970-2000, by CMIP6 source

CAS-ESM2, 1970-2000

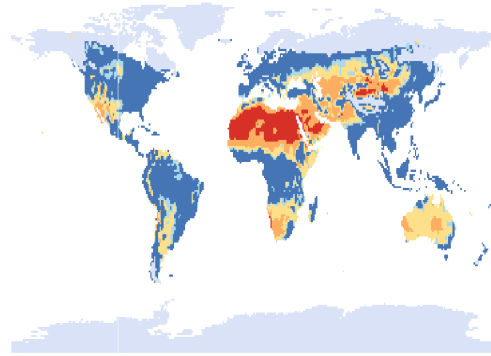

CESM, 1970-2000

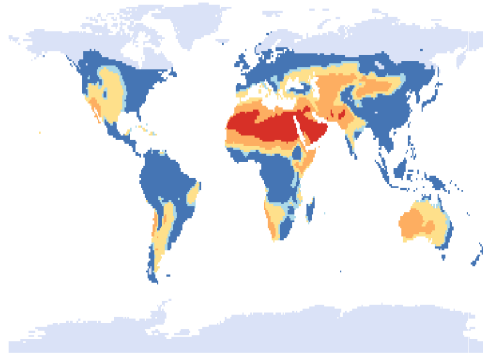

CMCC, 1970-2000

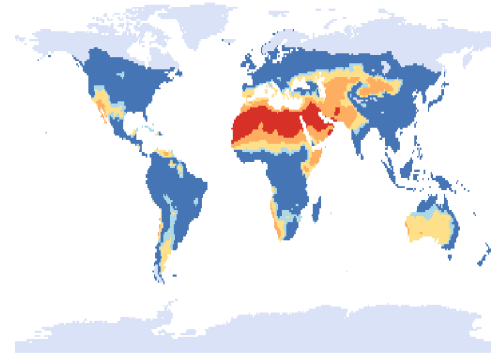

CMCC-ESM2, 1970-2000

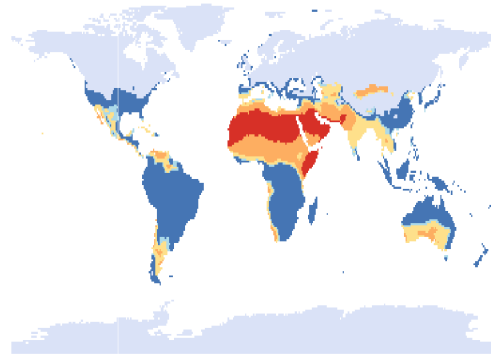

CNRM, 1970-2000

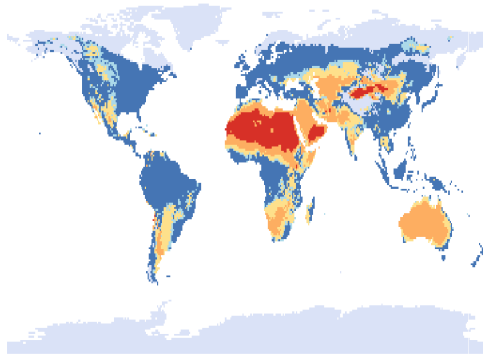

EC-Earth3, 1970-2000

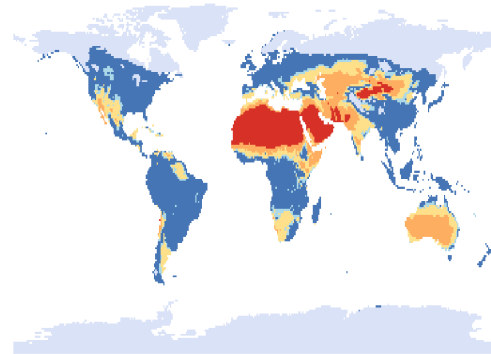

FGOALS, 1970-2000

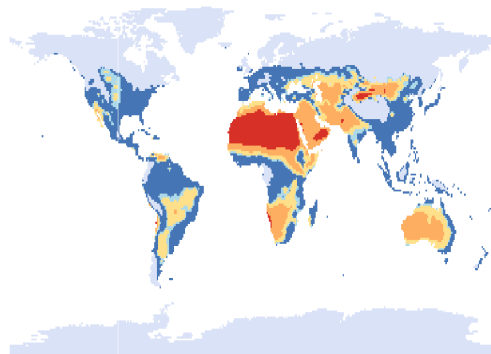

GFDL-ESM4, 1970-2000

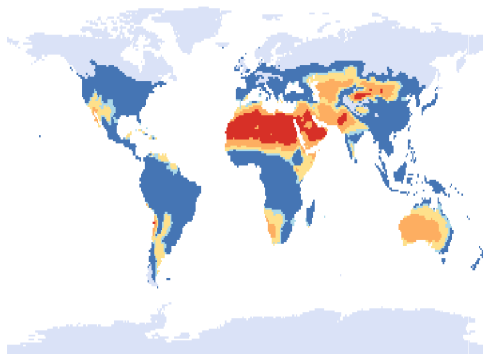

INM, 1970-2000

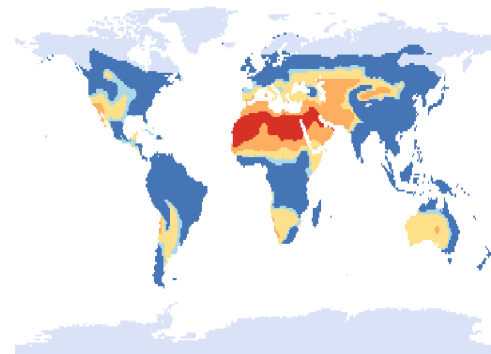

INM-CM5, 1970-2000

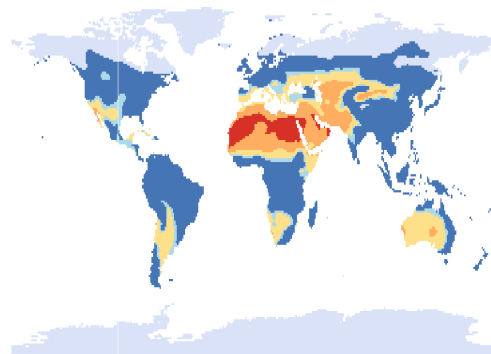

MPI, 1970-2000

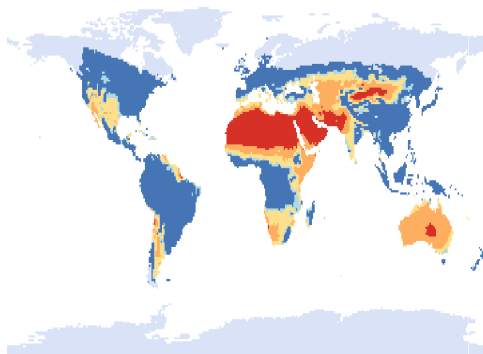

MRI, 1970-2000

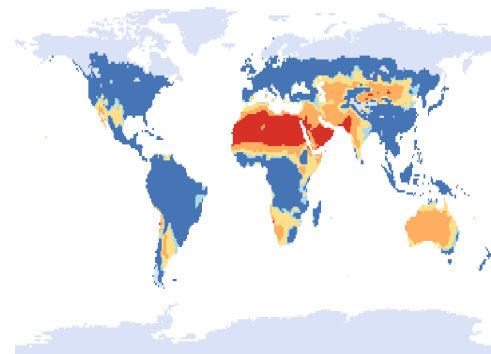

NorESM2-MM, 1970-2000

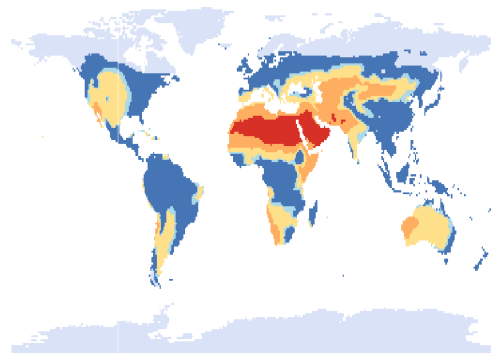

## S2. Differences in average annual precipitation and evapotranspiration in Worldclim, ERA5 and CMIP6

Annual precipitation in Wordclim

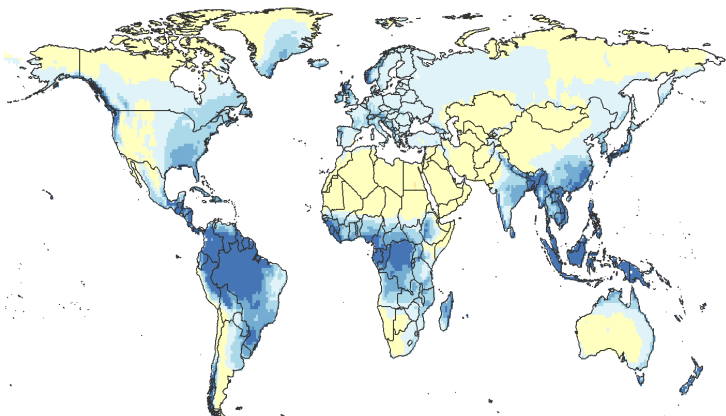

Annual evapotranspiration Wordclim

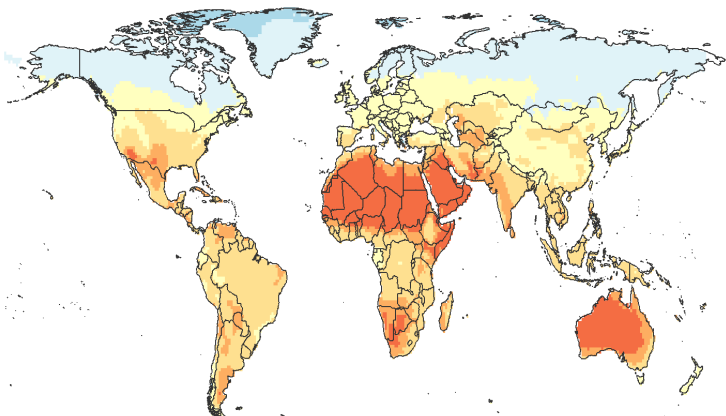

Annual precipitation in ERA5

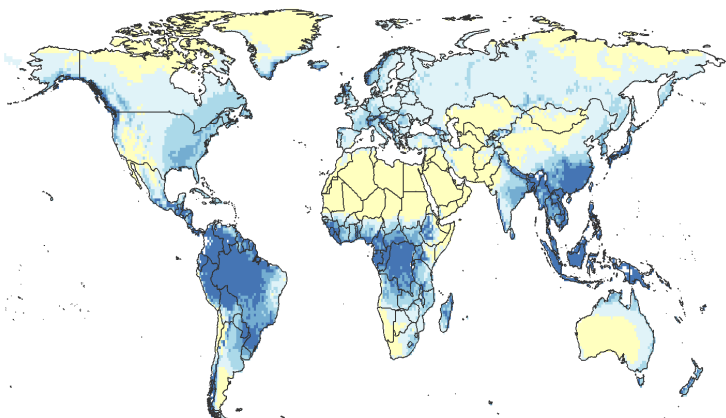

Annual evapotranspiration ERA5

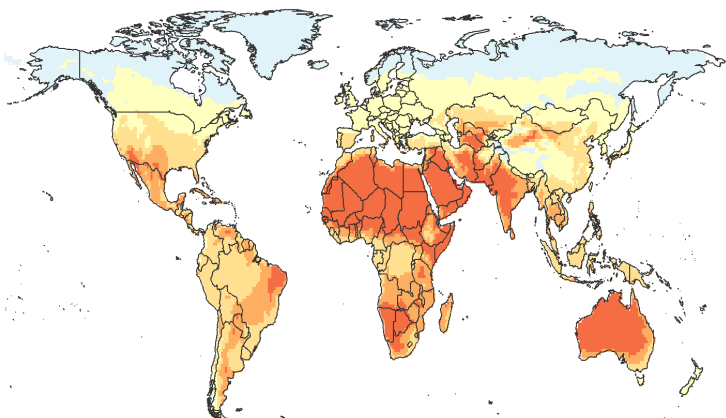

Annual precipitation CMIP6

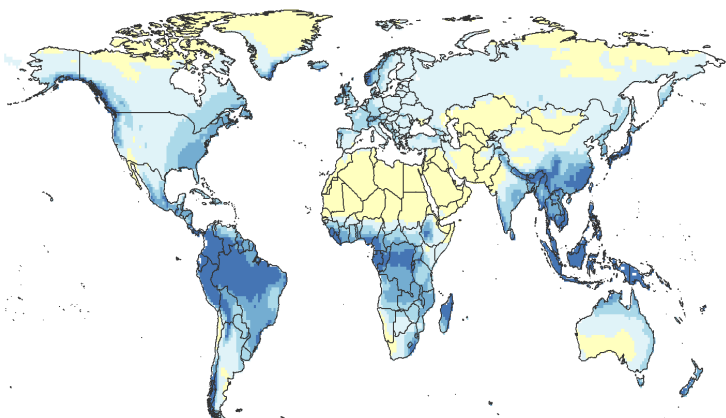

Annual evapotranspiration CMIP6

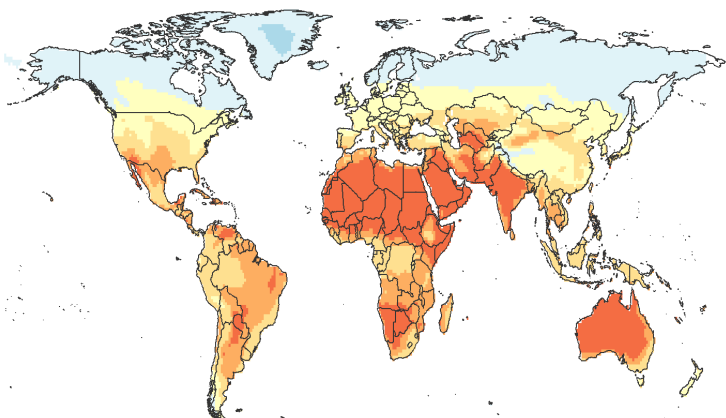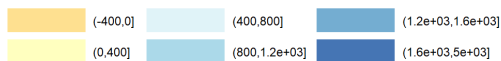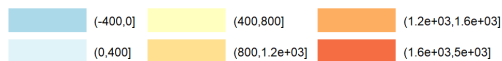

### S3. Multimodel average of aridity categories for SSP 2-4.5, 3-7.0 and 5-8.5

SSP245, 2030\_2060

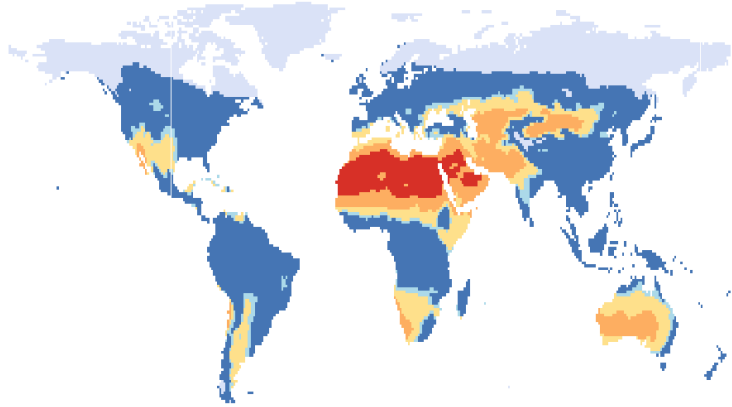

SSP245, 2070\_2100

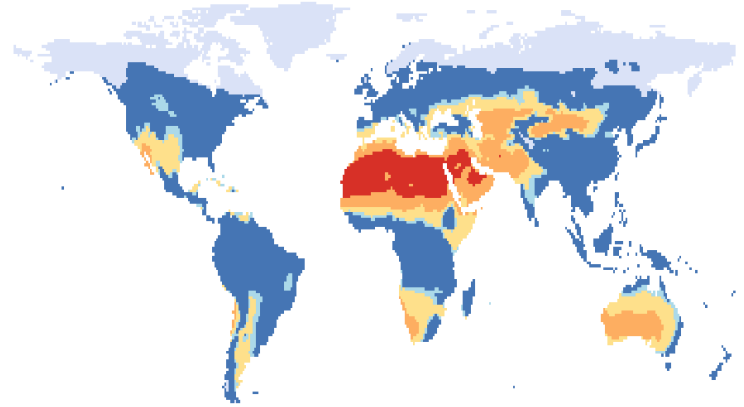

SSP370, 2030\_2060

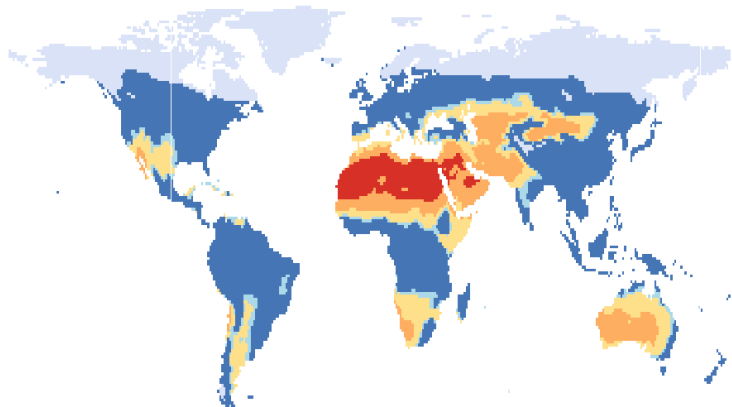

SSP370, 2070\_2100

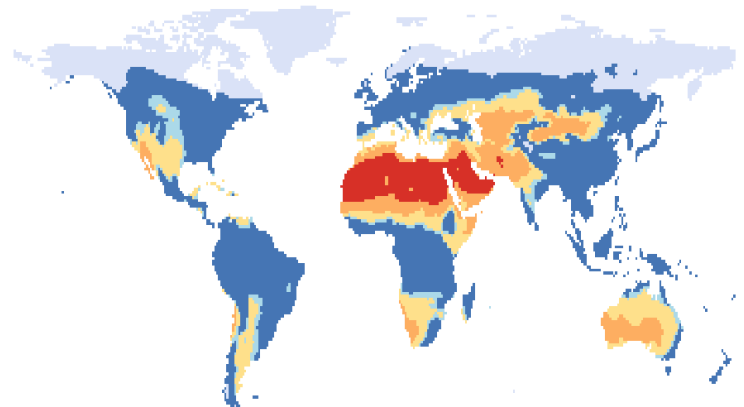

SSP585, 2030\_2060

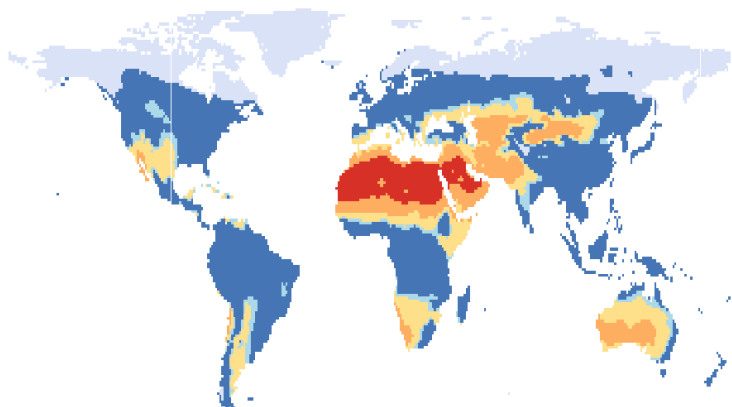

SSP585, 2070\_2100

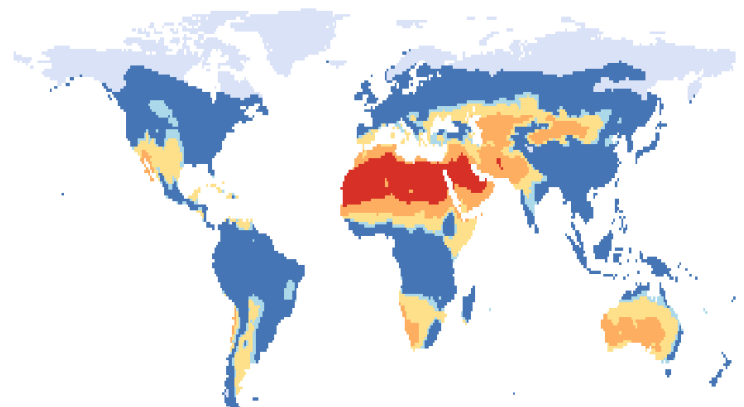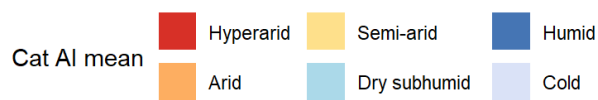

# S4. Aridity categories for reference period 1970-2000 and for the extreme case scenario SSP 5-8.5, period 2070-2100

Category AI 1970-2000

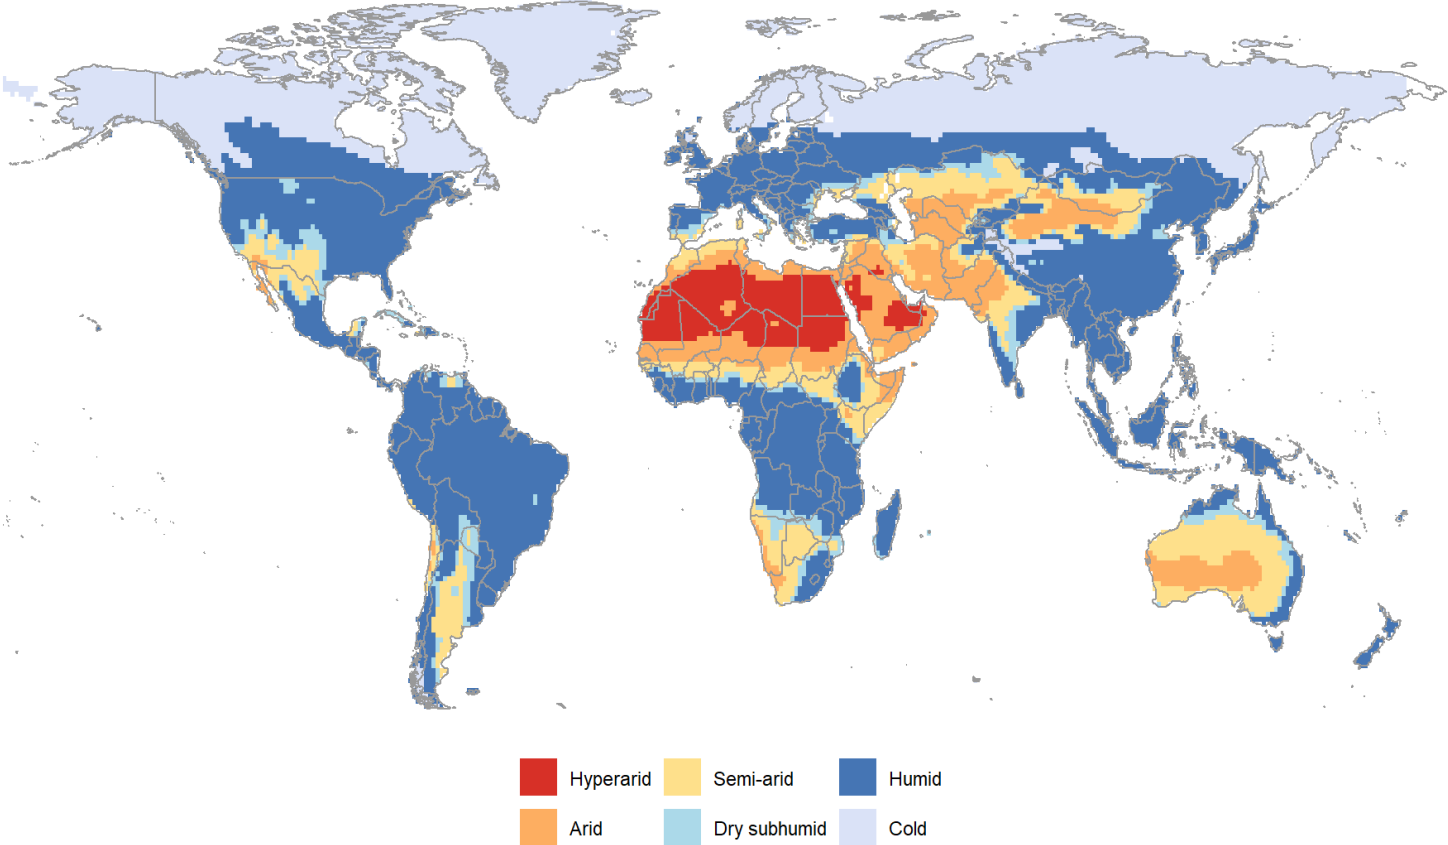

Category AI 2070-2100, SSP 585

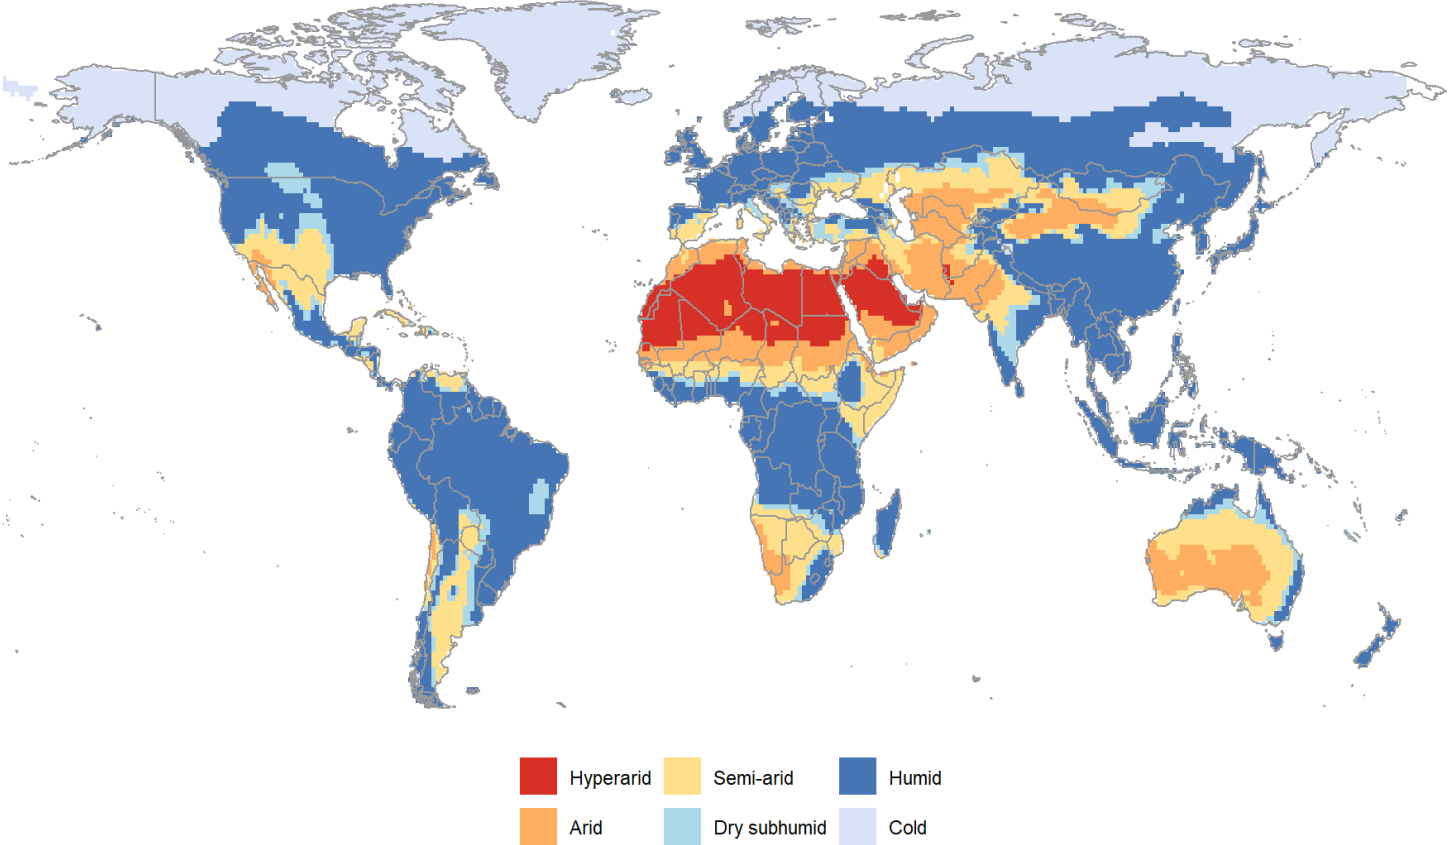

# S5. Temperature anomalies compared to reference period 1970-2000, in °C

SSP245 , 2030\_2060

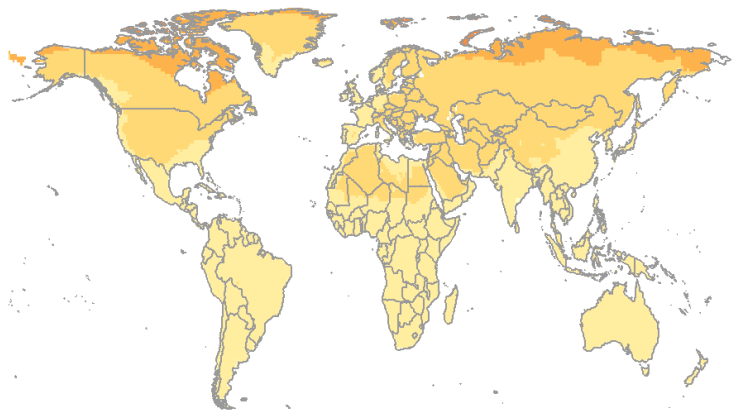

SSP245 , 2070\_2100

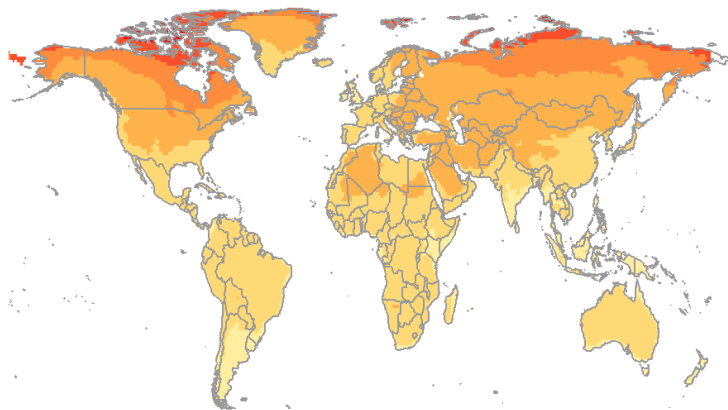

SSP370 , 2030\_2060

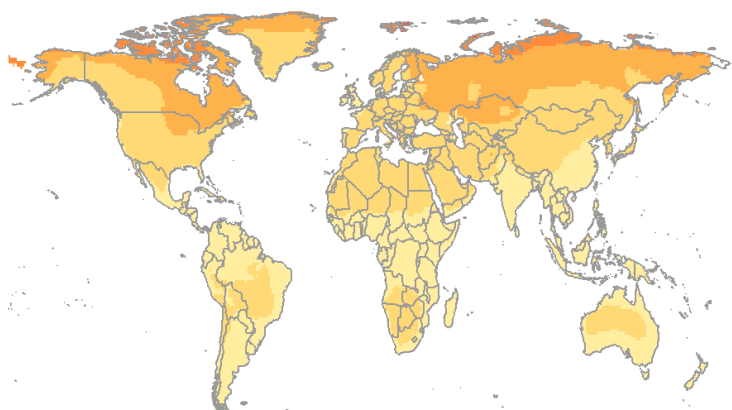

SSP370 , 2070\_2100

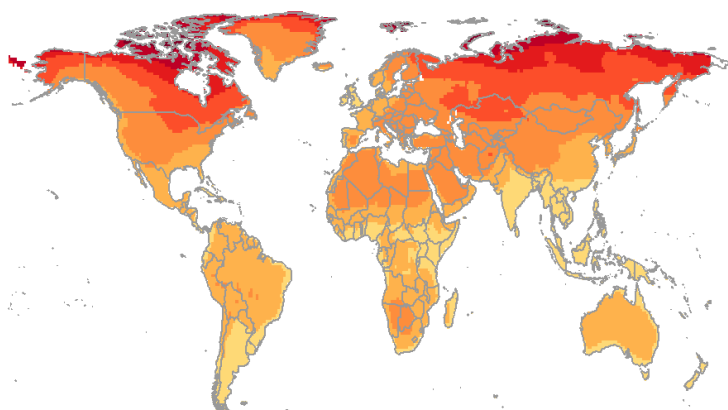

SSP585 , 2030\_2060

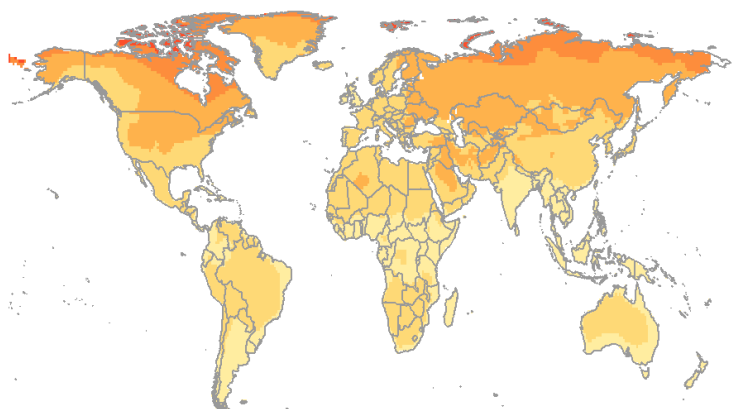

SSP585 , 2070\_2100

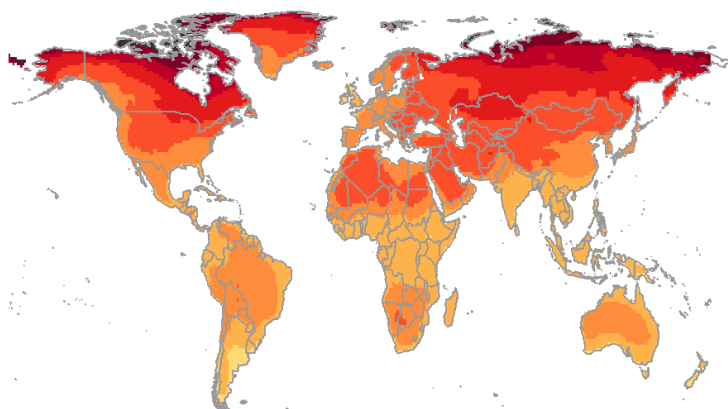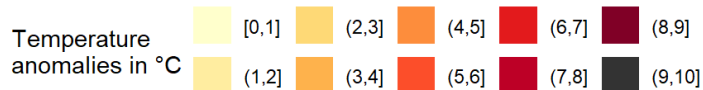

# S6. Precipitation anomalies compared to reference period 1970-2000, in %

SSP245 , 2030\_2060

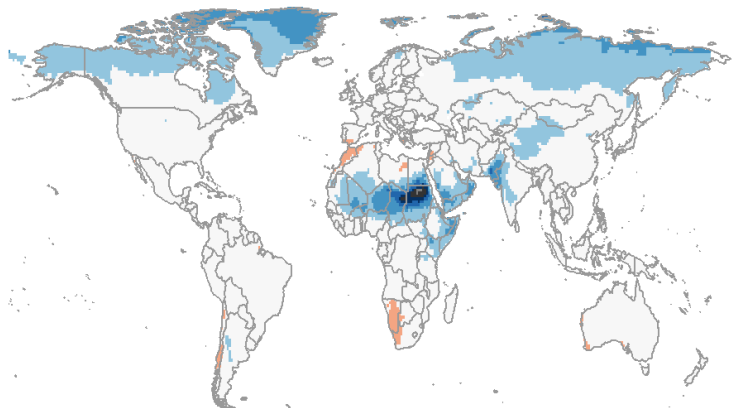

SSP245 , 2070\_2100

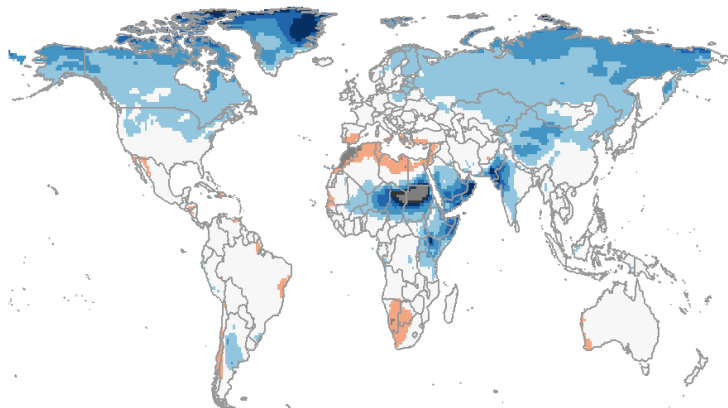

SSP370 , 2030\_2060

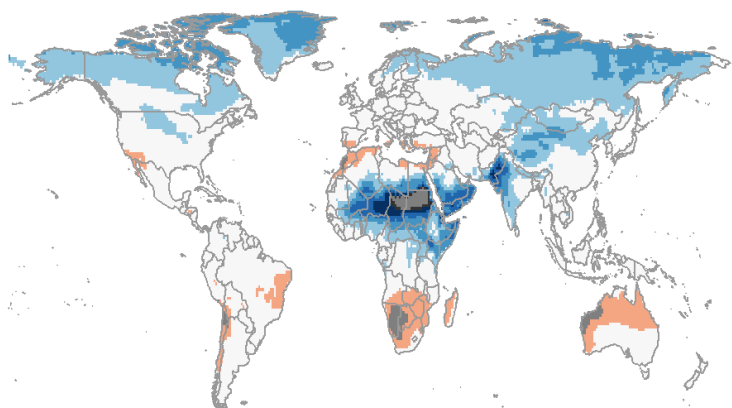

SSP370 , 2070\_2100

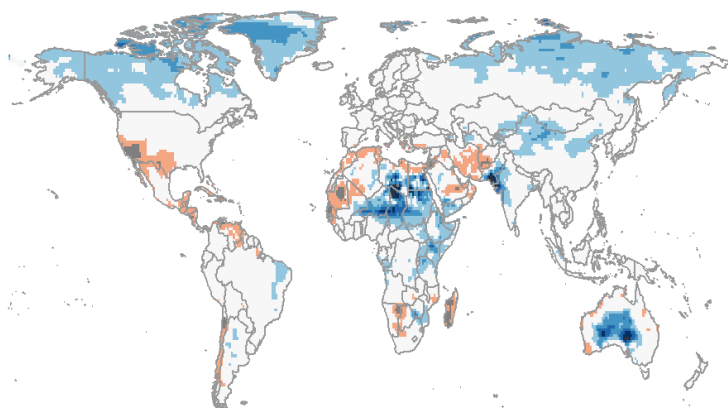

SSP585 , 2030\_2060

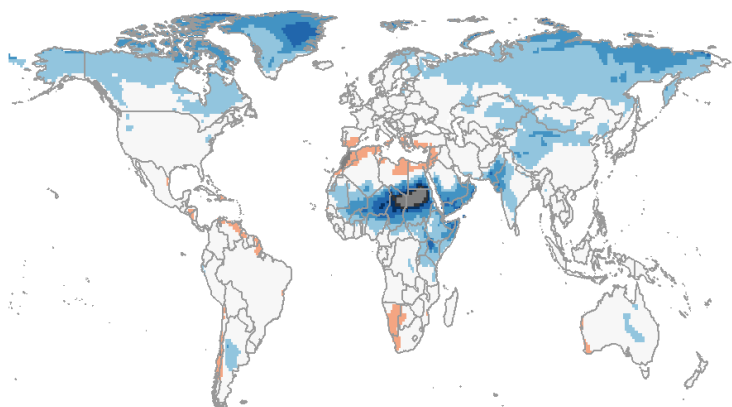

SSP585 , 2070\_2100

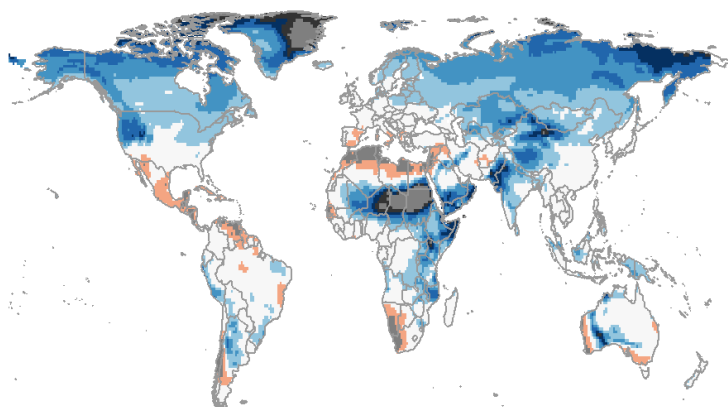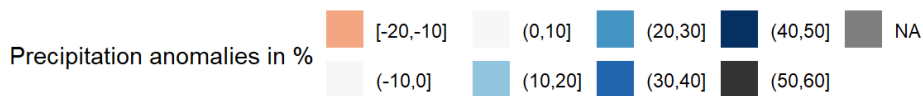

# S7. Gridcells changing towards a wetter category compared to 1970-2000 for the SSP 2-4.5, 3-7.0 and 5-8.5

SSP245 , 2030\_2060

SSP245 , 2070\_2100

SSP370 , 2030\_2060

SSP370 , 2070\_2100

SSP585 , 2030\_2060

SSP585 , 2070\_2100

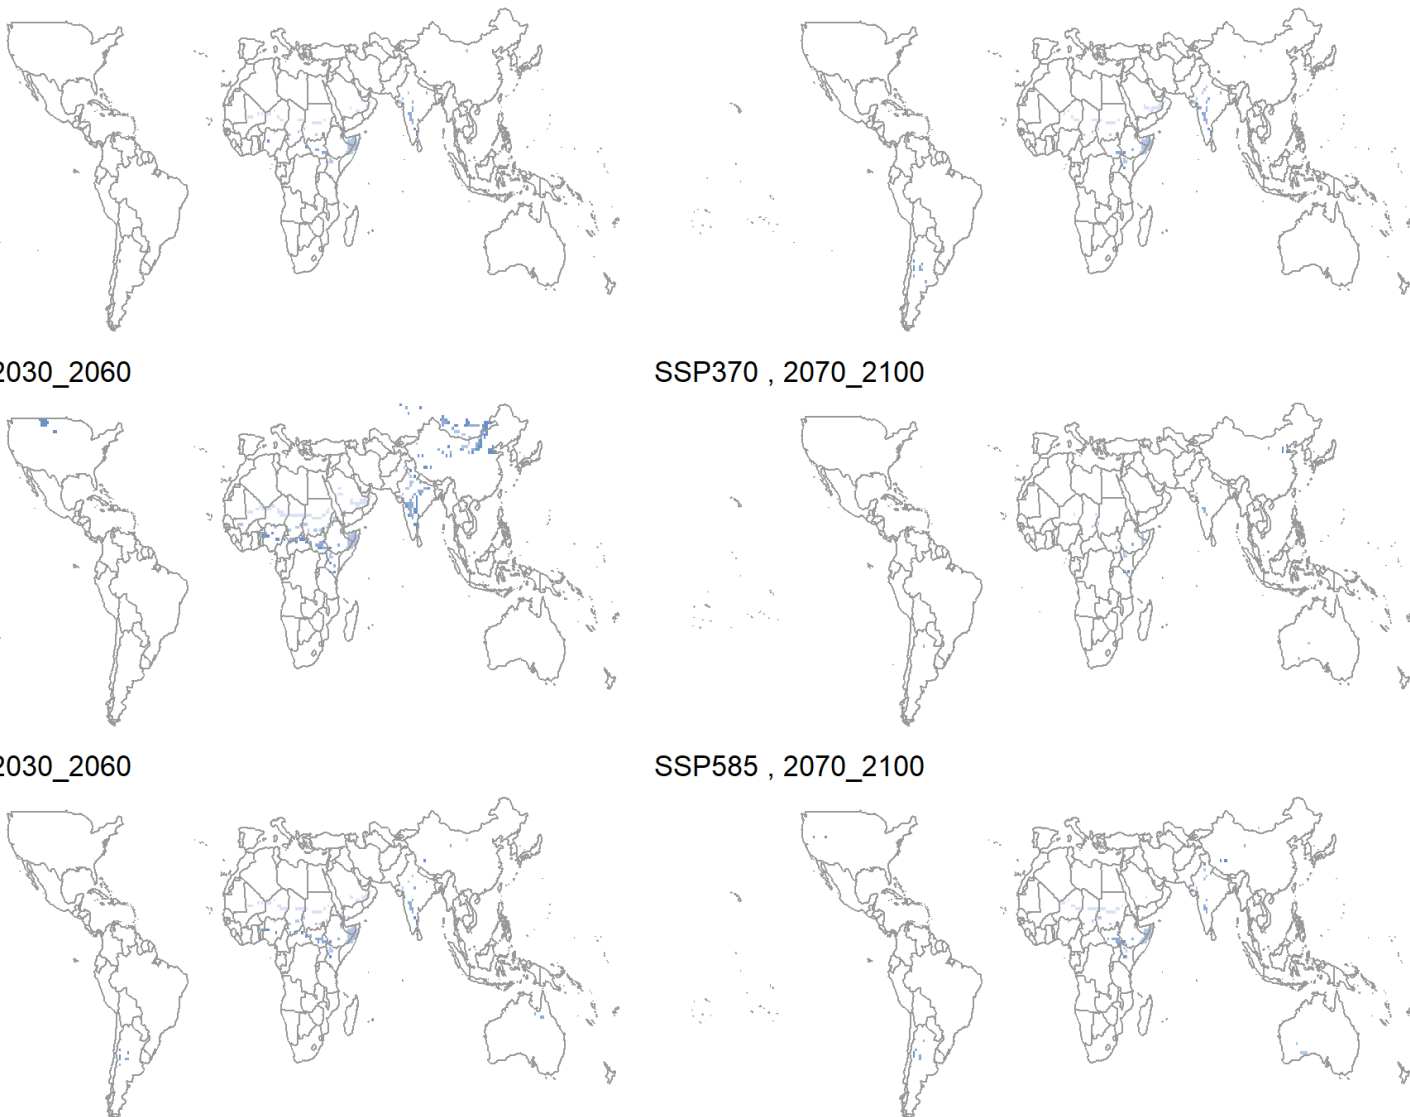

Change of category compared to 1970-2000

|                                                                                                                                                                  |                                                                                                                                                                          |
|------------------------------------------------------------------------------------------------------------------------------------------------------------------|--------------------------------------------------------------------------------------------------------------------------------------------------------------------------|
| <span style="display: inline-block; width: 15px; height: 10px; background-color: #add8e6; border: 1px solid black; margin-right: 5px;"></span> Hyperarid to Arid | <span style="display: inline-block; width: 15px; height: 10px; background-color: #00008b; border: 1px solid black; margin-right: 5px;"></span> Semi-arid to Dry subhumid |
| <span style="display: inline-block; width: 15px; height: 10px; background-color: #4682b4; border: 1px solid black; margin-right: 5px;"></span> Arid to Semi-arid | <span style="display: inline-block; width: 15px; height: 10px; background-color: #00008b; border: 1px solid black; margin-right: 5px;"></span> Dry subhumid to Humid     |

# S8. Gridcells changing towards a dryer category compared to 1970-2000 for the SSP 2-4.5, 3-7.0 and 5-8.5

SSP245 , 2030\_2060

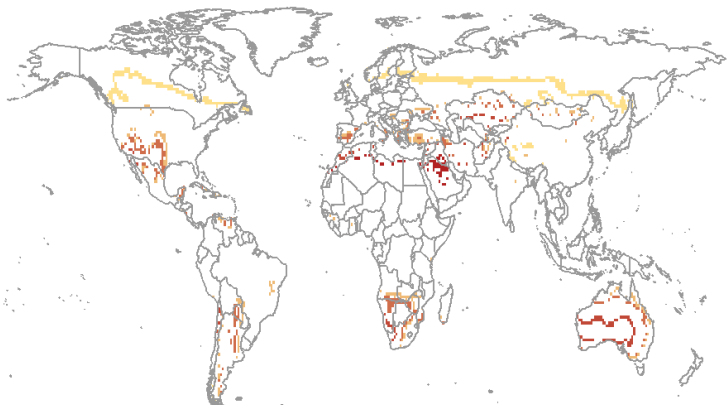

SSP245 , 2070\_2100

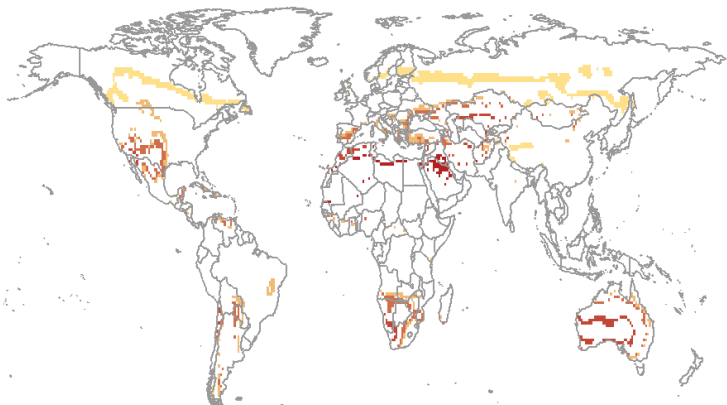

SSP370 , 2030\_2060

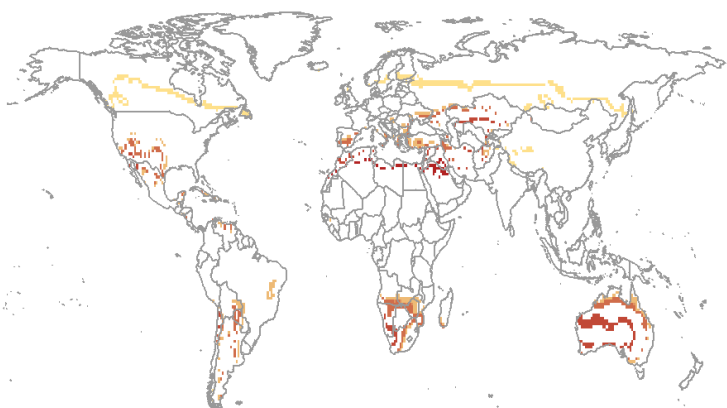

SSP370 , 2070\_2100

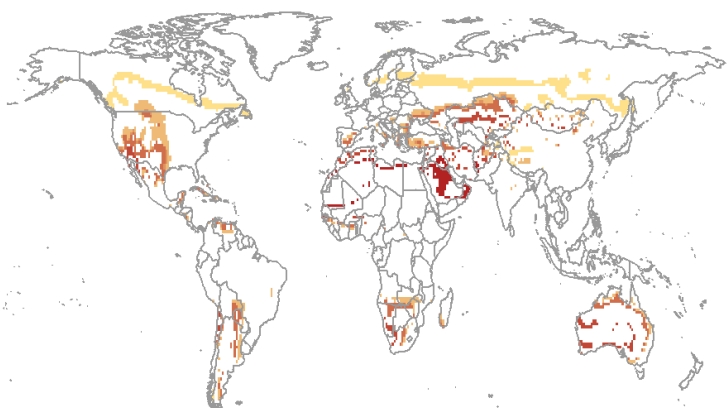

SSP585 , 2030\_2060

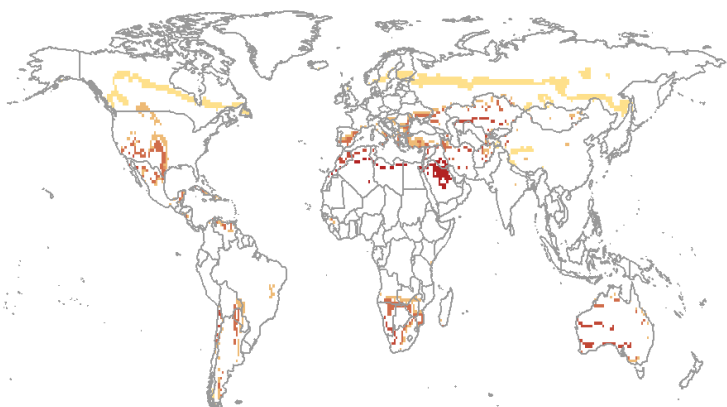

SSP585 , 2070\_2100

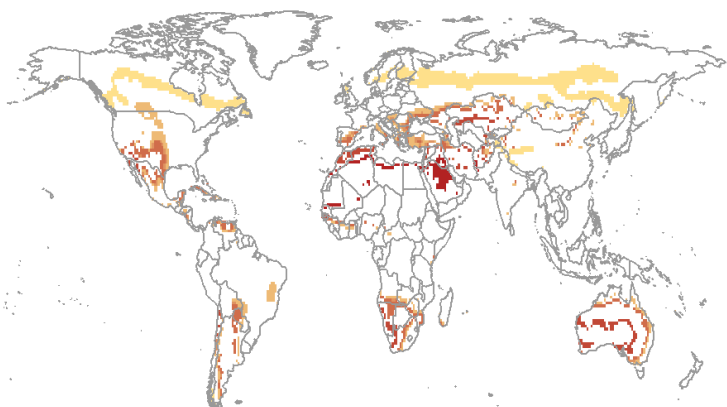

Change of category compared to 1970-2000

|                                                                                     |                       |                                                                                     |                           |                                                                                       |                   |
|-------------------------------------------------------------------------------------|-----------------------|-------------------------------------------------------------------------------------|---------------------------|---------------------------------------------------------------------------------------|-------------------|
|  | Cold to Humid         |  | Humid to Semi-arid        |  | Semi-arid to Arid |
|  | Humid to Dry subhumid |  | Dry subhumid to Semi-arid |  | Arid to Hyperarid |



# S9. IPCC regions

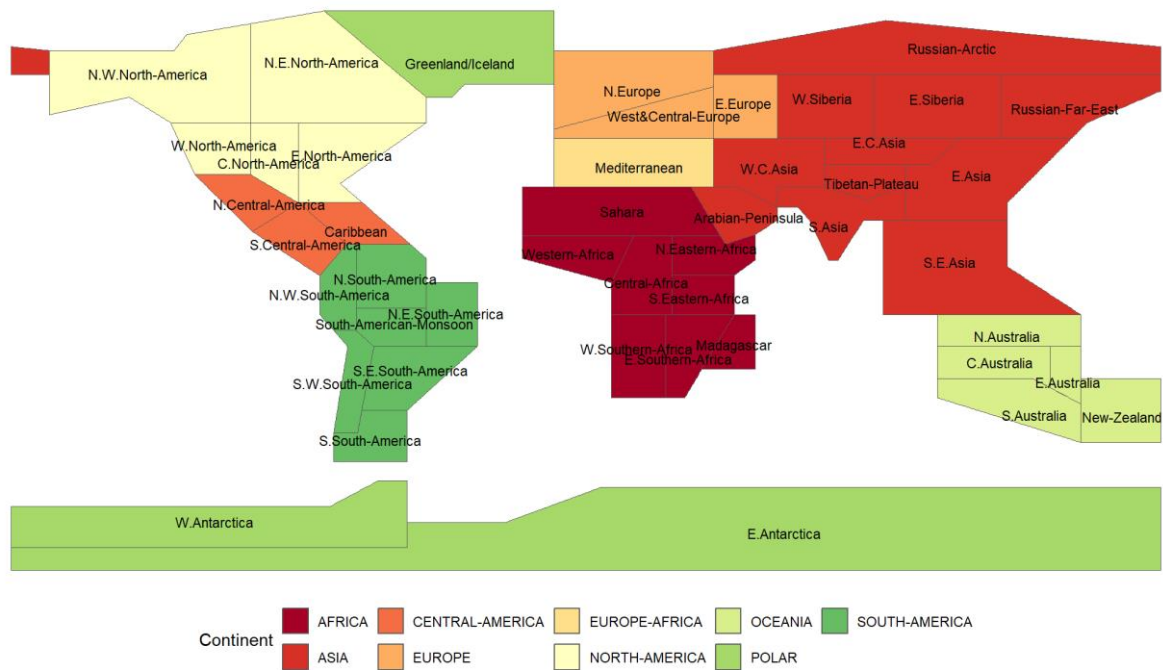

# T1. Proportion and change of proportion of drylands by Continent and by SSP

|                 |                                                    | SSP 2 – 4.5         | SSP 3 – 7.0  | SSP 5 – 8.5  |
|-----------------|----------------------------------------------------|---------------------|--------------|--------------|
| Africa          | Proportion in the reference period 1970-2000, in % | <b>64.9 ± 7.32</b>  |              |              |
|                 | Proportion for the period 2070-2100, in %          | 68.7 ± 7.8          | 68.4 ± 6.89  | 69.2 ± 12.58 |
|                 | Change, in %                                       | 3.8 ± 10.7 %        | 3.5 ± 10.1   | 4.3 ± 14.6   |
| Asia            | Proportion in the reference period 1970-2000, in % | <b>28.5 ± 3.33</b>  |              |              |
|                 | Proportion for the period 1970-2100, in %          | 29.9 ± 3.56         | 30.5 ± 3.09  | 32.5 ± 5.86  |
|                 | Change, in %                                       | 1.4 ± 4.9           | 2 ± 4.5      | 4 ± 6.7      |
| Central America | Proportion in the reference period 1970-2000, in % | <b>52.8 ± 11.64</b> |              |              |
|                 | Proportion for the period 1970-2100, in %          | 64.8 ± 12.84        | 68.7 ± 13.21 | 73.1 ± 13.72 |
|                 | Change, in %                                       | 12 ± 17.3           | 15.9 ± 17.6  | 20.3 ± 18    |
| Europe          | Proportion in the reference period 1970-2000, in % | <b>14.3 ± 4.12</b>  |              |              |
|                 | Proportion for the period 1970-2100, in %          | 17.4 ± 5.44         | 20.9 ± 7.1   | 20.2 ± 6.36  |
|                 | Change, in %                                       | 3.1 ± 6.8           | 6.6 ± 8.2    | 5.9 ± 7.6    |
| Europe-Africa   | Proportion in the reference period 1970-2000, in % | <b>66.7 ± 14.24</b> |              |              |
|                 | Proportion for the period 1970-2100, in %          | 77 ± 13.61          | 77.5 ± 14.81 | 80.2 ± 14.82 |
|                 | Change, in %                                       | 10.3 ± 19.7         | 10.8 ± 20.5  | 13.5 ± 20.6  |
| North-America   | Proportion in the reference period 1970-2000, in % | <b>8.9 ± 5.02</b>   |              |              |
|                 | Proportion for the period 1970-2100, in %          | 12 ± 5.87           | 13.7 ± 4.53  | 13.4 ± 6.74  |
|                 | Change, in %                                       | 3.1 ± 7.7           | 4.8 ± 6.8    | 4.5 ± 8.4    |
| Oceania         | Proportion in the reference period 1970-2000, in % | <b>80.1 ± 31.77</b> |              |              |
|                 | Proportion for the period 1970-2100, in %          | 83.7 ± 25.99        | 82.8 ± 26.32 | 83.6 ± 26.16 |
|                 | Change, in %                                       | 3.6 ± 41            | 2.7 ± 41.3   | 3.5 ± 41.2   |
| South-America   | Proportion in the reference period 1970-2000, in % | <b>23.1 ± 5.05</b>  |              |              |
|                 | Proportion for the period 1970-2100, in %          | 31.1 ± 10.78        | 30.8 ± 8.35  | 34.3 ± 11    |
|                 | Change, in %                                       | 8 ± 11.9            | 7.7 ± 9.8    | 11.2 ± 12.1  |

## T2. Proportion of aridity categories by period, model and continent

### AFRICA

|                   | period           | Hyperarid         | Arid              | Semi-Arid         | Dry subhumid     | Sum drylands        | Humid             | Cold           |
|-------------------|------------------|-------------------|-------------------|-------------------|------------------|---------------------|-------------------|----------------|
| historical        | 1850_1880        | 27.2 ± 4.7        | 17.1 ± 4.9        | 15.6 ± 3.6        | 6.3 ± 1.4        | <b>66.2 ± 7.81</b>  | 33.7 ± 7.1        | 0 ± 0          |
| <b>historical</b> | <b>1970_2000</b> | <b>26.9 ± 4.7</b> | <b>16.7 ± 4.2</b> | <b>15.1 ± 3.4</b> | <b>6.2 ± 1.5</b> | <b>64.9 ± 7.32</b>  | <b>32.8 ± 6.2</b> | <b>2.3 ± 0</b> |
| historical        | 1985_2015        | 26.5 ± 4.8        | 17.1 ± 4.6        | 15.4 ± 3.3        | 6 ± 1.5          | <b>65 ± 7.57</b>    | 32.7 ± 6.3        | 2.2 ± 0        |
| SSP245            | 2030_2060        | 27 ± 4.8          | 18 ± 4.9          | 16.5 ± 3.5        | 6.4 ± 1.7        | <b>67.9 ± 7.89</b>  | 32 ± 7.6          | 0 ± 0          |
| SSP245            | 2070_2100        | 27.9 ± 4.7        | 17.4 ± 5          | 17.2 ± 3.4        | 6.2 ± 1.5        | <b>68.7 ± 7.8</b>   | 31.3 ± 7.9        | 0 ± 0          |
| SSP370            | 2030_2060        | 26 ± 5            | 16.6 ± 3.6        | 17.2 ± 1.8        | 6.8 ± 1          | <b>66.6 ± 6.5</b>   | 32.3 ± 6.7        | 1.1 ± 0        |
| SSP370            | 2070_2100        | 28 ± 3.5          | 17.6 ± 4.8        | 16.6 ± 3.1        | 6.2 ± 1.6        | <b>68.4 ± 6.89</b>  | 30.4 ± 6.4        | 1.2 ± 0        |
| SSP585            | 2030_2060        | 27.1 ± 4.6        | 17.6 ± 4.8        | 16.8 ± 3.5        | 6.3 ± 1.5        | <b>67.8 ± 7.66</b>  | 32.1 ± 7.5        | 0 ± 0          |
| SSP585            | 2070_2100        | 29.7 ± 10.5       | 17.3 ± 5.3        | 16.2 ± 4.2        | 6 ± 1.5          | <b>69.2 ± 12.58</b> | 30.9 ± 8.6        | 0 ± 0          |

# S10. Percent change of Aridity index in Africa

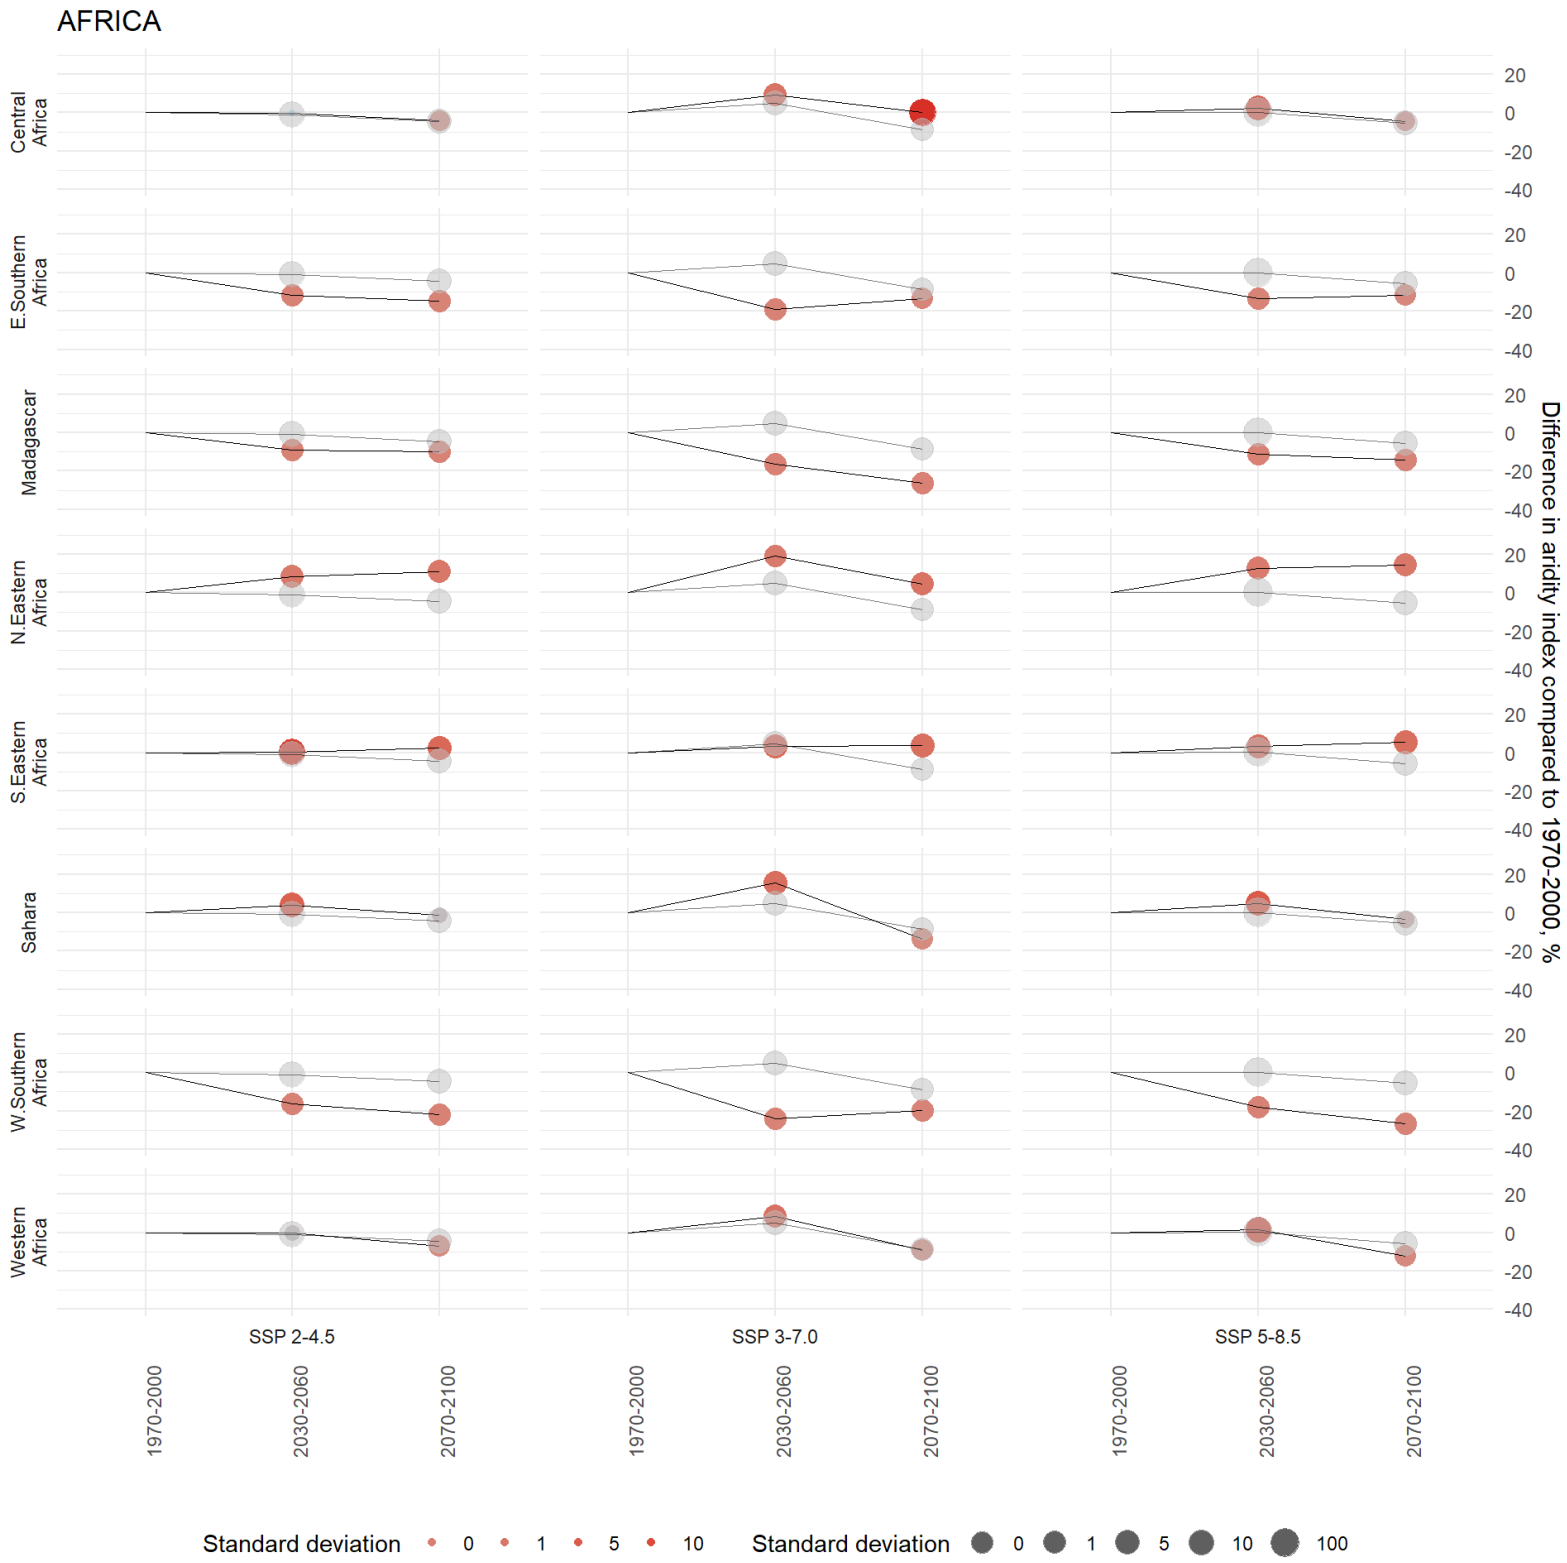

### T3. Proportion of aridity categories by period, model and continent

#### *NORTH AMERICA*

| model             | period           | Hyperarid    | Arid             | Semi-Arid        | Dry subhumid     | Sum drylands      | Humid             | Cold               |
|-------------------|------------------|--------------|------------------|------------------|------------------|-------------------|-------------------|--------------------|
| historical        | 1850–1880        | 0 ± 0        | 0.4 ± 0.2        | 5.8 ± 5.6        | 4.3 ± 2.6        | 10.5 ± 6.18       | 35.1 ± 9          | 54.2 ± 10.9        |
| <b>historical</b> | <b>1970–2000</b> | <b>0 ± 0</b> | <b>0.4 ± 0.2</b> | <b>4.3 ± 4.4</b> | <b>4.2 ± 2.4</b> | <b>8.9 ± 5.02</b> | <b>34.5 ± 9.8</b> | <b>56.5 ± 11.7</b> |
| historical        | 1985–2015        | 0 ± 0        | 0.3 ± 0.2        | 4.6 ± 3.8        | 4.1 ± 2.2        | 9 ± 4.4           | 33.6 ± 10.3       | 57.2 ± 11.5        |
| SSP245            | 2030–2060        | 0 ± 0        | 0.4 ± 0.3        | 6.5 ± 5.5        | 4.7 ± 2.6        | 11.6 ± 6.09       | 37.5 ± 8.7        | 50.8 ± 11.1        |
| SSP245            | 2070–2100        | 0 ± 0        | 0.5 ± 0.3        | 6.4 ± 5.1        | 5.1 ± 2.9        | 12 ± 5.87         | 39.7 ± 9          | 48.1 ± 11          |
| SSP370            | 2030–2060        | 0 ± 0        | 0.5 ± 0.4        | 5.9 ± 4.8        | 4.6 ± 2.7        | 11 ± 5.52         | 37 ± 9.7          | 51.8 ± 12.2        |
| SSP370            | 2070–2100        | 0.1 ± 0      | 0.8 ± 0.7        | 7.6 ± 4          | 5.2 ± 2          | 13.7 ± 4.53       | 38.4 ± 10.6       | 47.7 ± 11.2        |
| SSP585            | 2030–2060        | 0 ± 0        | 0.5 ± 0.4        | 6.6 ± 5.2        | 5.2 ± 2.8        | 12.3 ± 5.92       | 38.2 ± 9.1        | 49.3 ± 11.7        |
| SSP585            | 2070–2100        | 0.2 ± 0      | 1 ± 1.4          | 7 ± 6.1          | 5.2 ± 2.5        | 13.4 ± 6.74       | 42.1 ± 9.3        | 44.5 ± 11.3        |

# S11. Percent change of Aridity index in North America

## NORTH-AMERICA

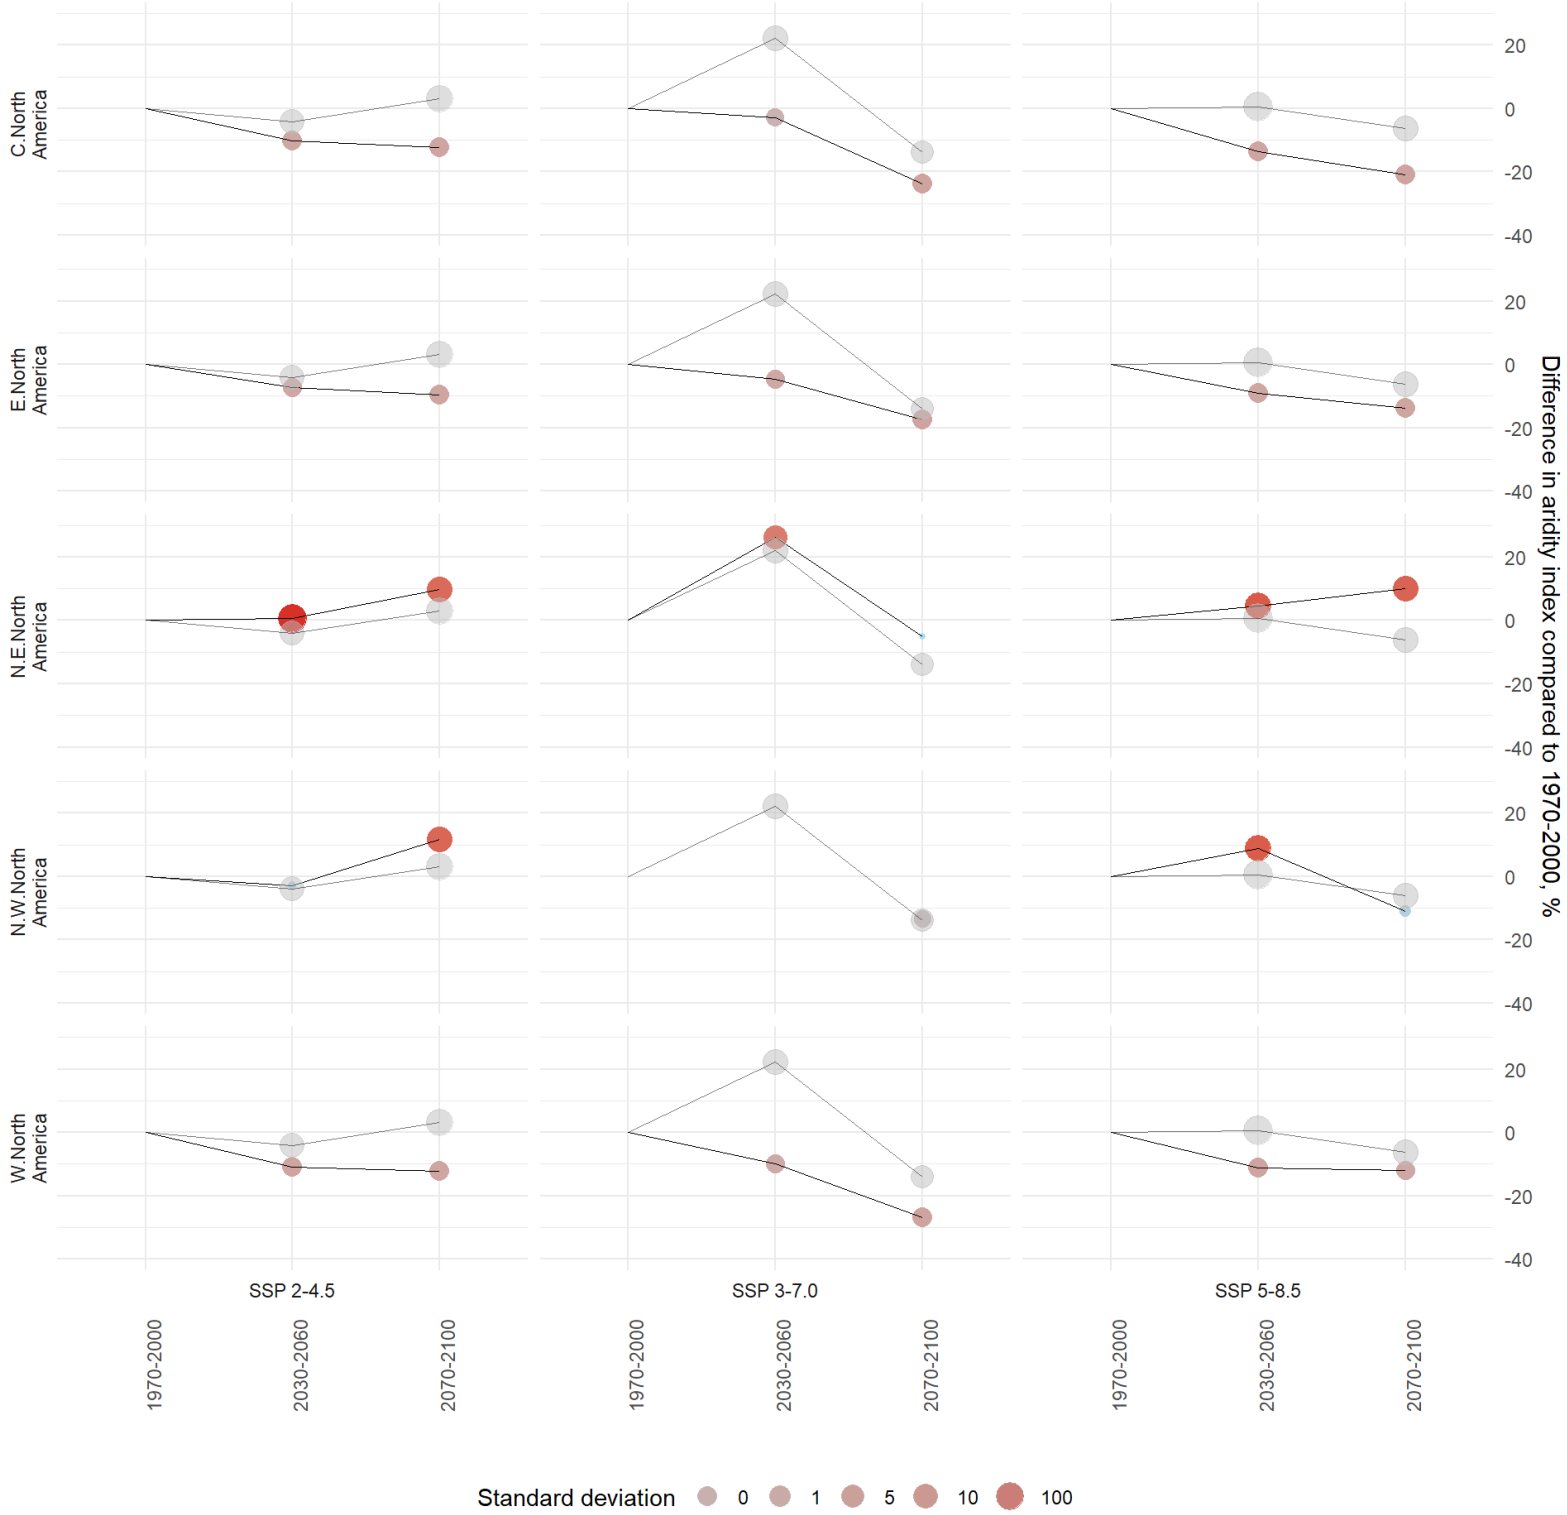

# T4. Proportion of aridity categories by period, model and continent

## CENTRAL AMERICA

| model             | period                | Hyperarid    | Arid                 | Semi-Arid             | Dry subhumid      | Sum drylands            | Humid                | Cold         |
|-------------------|-----------------------|--------------|----------------------|-----------------------|-------------------|-------------------------|----------------------|--------------|
| historical        | 1850_1<br>880         | 0 ± 0        | 8.4 ±<br>3.6         | 30.1 ±<br>5.1         | 16.1 ± 8.7        | <b>54.6 ±<br/>10.71</b> | 45 ± 6.1             | 0 ± 0        |
| <b>historical</b> | <b>1970_2<br/>000</b> | <b>0 ± 0</b> | <b>8.4 ±<br/>4.1</b> | <b>29.7 ±<br/>7.6</b> | <b>14.7 ± 7.8</b> | <b>52.8 ±<br/>11.64</b> | <b>44.9 ±<br/>12</b> | <b>2 ± 0</b> |
| historical        | 1985_2<br>015         | 0 ± 0        | 9 ± 4.2              | 30.7 ± 7              | 14.8 ± 7.4        | <b>54.5 ±<br/>11.02</b> | 43.8 ±<br>11.5       | 1.4 ±<br>0   |
| SSP245            | 2030_2<br>060         | 0 ± 0        | 11.9 ±<br>6.2        | 36.3 ± 8              | 13.9 ± 6.2        | <b>62.1 ±<br/>11.87</b> | 37.6 ±<br>8.6        | 0 ± 0        |
| SSP245            | 2070_2<br>100         | 0 ± 0        | 12.3 ±<br>5.5        | 38.1 ±<br>8.5         | 14.4 ± 7.9        | <b>64.8 ±<br/>12.84</b> | 34.8 ±<br>8.6        | 0 ± 0        |
| SSP370            | 2030_2<br>060         | 0 ± 0        | 12.6 ±<br>6.3        | 31.4 ±<br>7.1         | 15 ± 7.9          | <b>59 ±<br/>12.35</b>   | 40.7 ±<br>11.8       | 0 ± 0        |
| SSP370            | 2070_2<br>100         | 4 ± 5.2      | 16 ±<br>5.5          | 35.5 ±<br>9.5         | 13.2 ± 5.2        | <b>68.7 ±<br/>13.21</b> | 30.9 ±<br>10.6       | 0 ± 0        |
| SSP585            | 2030_2<br>060         | 0 ± 0        | 13 ± 7               | 37.6 ± 9              | 14.1 ± 7.1        | <b>64.7 ±<br/>13.43</b> | 35 ± 9.4             | 0 ± 0        |
| SSP585            | 2070_2<br>100         | 2 ± 2.4      | 16.6 ±<br>8          | 41.2 ±<br>7.7         | 13.3 ± 7.7        | <b>73.1 ±<br/>13.72</b> | 26.6 ±<br>8.8        | 0 ± 0        |

# S12. Percent change of Aridity index in Central America

## CENTRAL-AMERICA

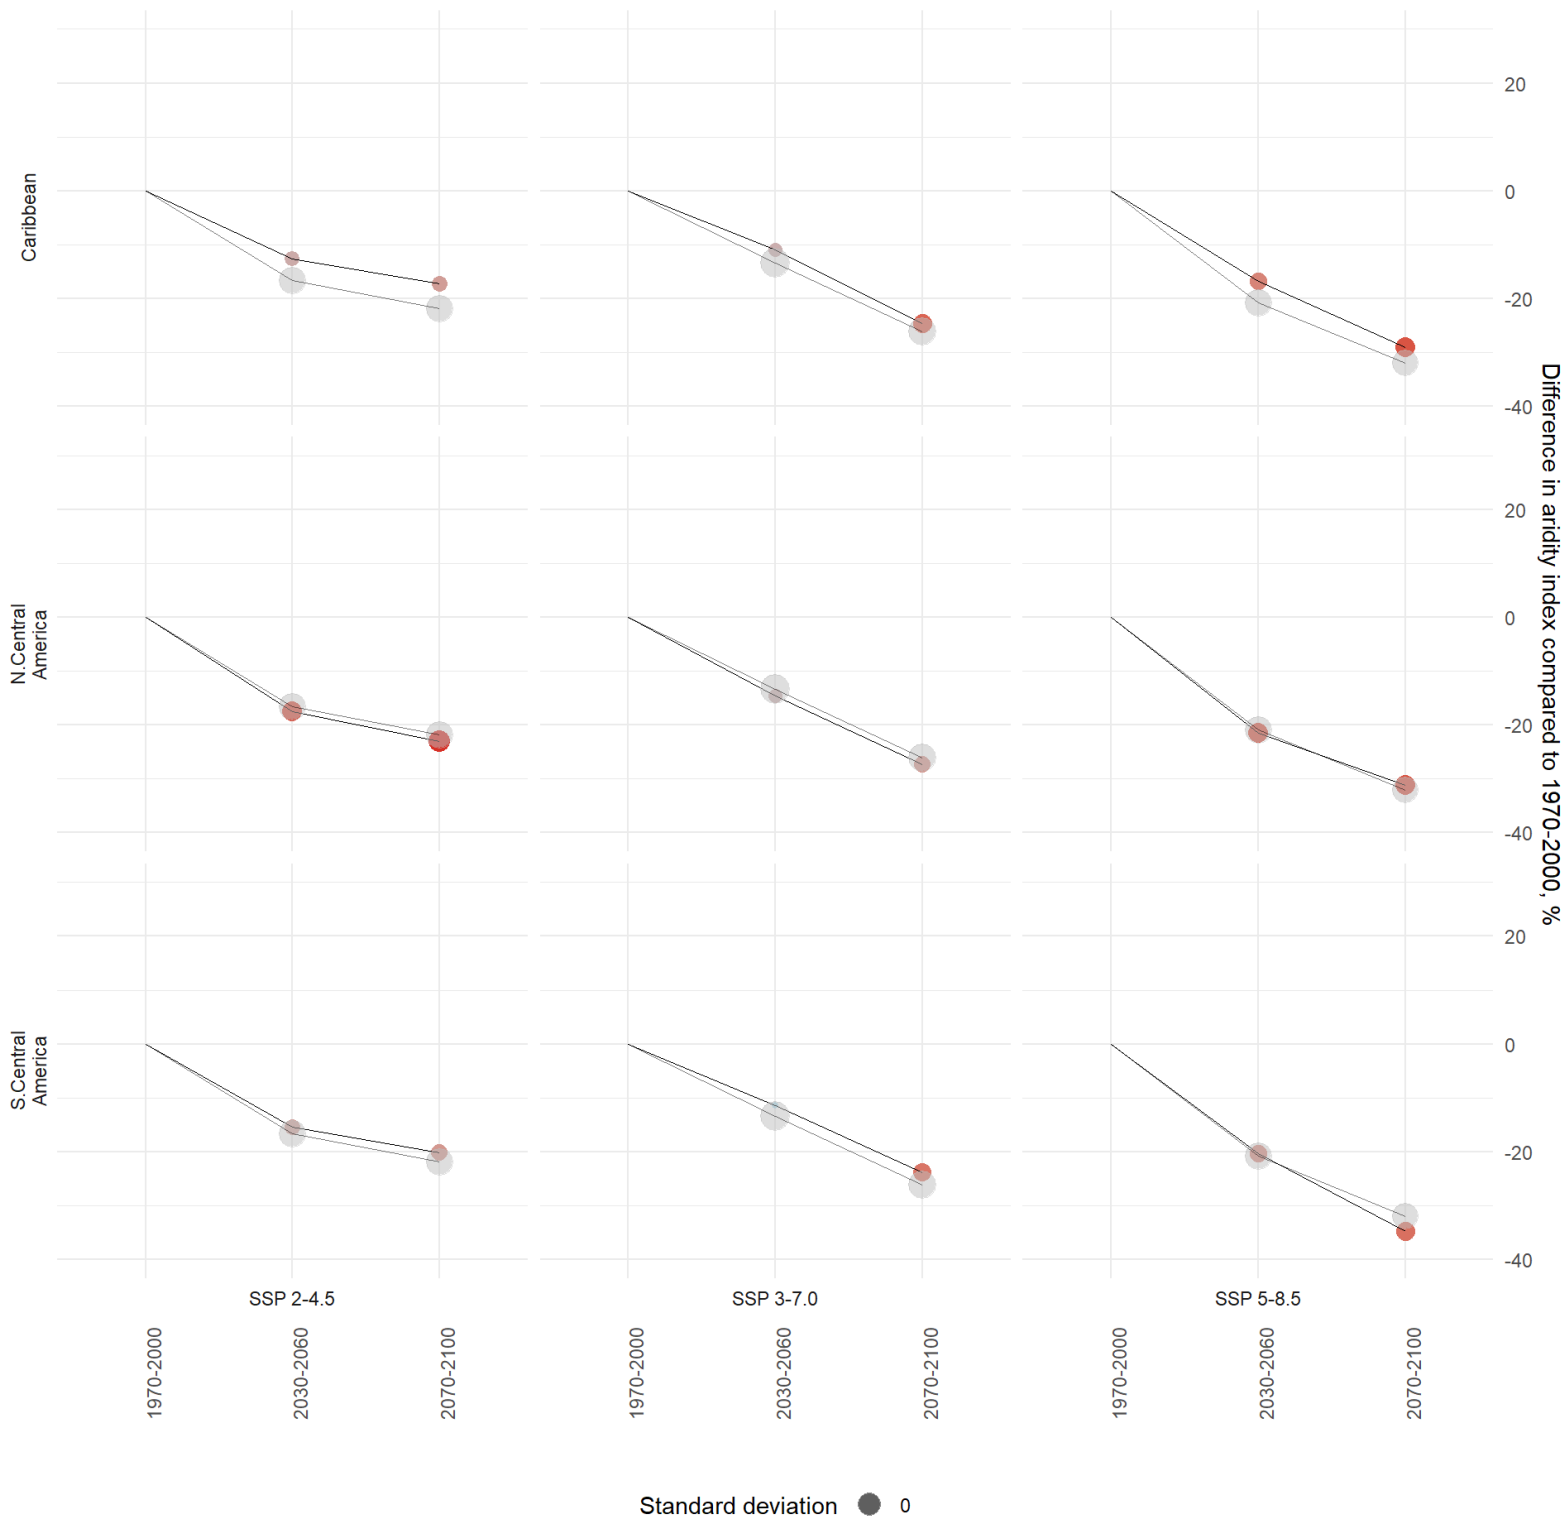

Standard deviation ● 0



# T5. Proportion of aridity categories by period, model and continent

## *SOUTH AMERICA*

| model             | period           | Hyperarid        | Arid             | Semi-Arid         | Dry subhumid     | Sum drylands        | Humid             | Cold             |
|-------------------|------------------|------------------|------------------|-------------------|------------------|---------------------|-------------------|------------------|
| historical        | 1850_1880        | 0.1 ± 0.1        | 2.1 ± 1.7        | 15.2 ± 8.7        | 7.4 ± 2.6        | <b>24.8 ± 9.24</b>  | 73.2 ± 11.7       | 1.9 ± 1          |
| <b>historical</b> | <b>1970_2000</b> | <b>0.1 ± 0.1</b> | <b>1.8 ± 1.3</b> | <b>13.9 ± 4.3</b> | <b>7.3 ± 2.3</b> | <b>23.1 ± 5.05</b>  | <b>74.5 ± 7.3</b> | <b>2.3 ± 2.6</b> |
| historical        | 1985_2015        | 0.2 ± 0.1        | 2 ± 1.2          | 14.5 ± 5.1        | 7.5 ± 2.4        | <b>24.2 ± 5.76</b>  | 73.6 ± 7.7        | 2.1 ± 2.6        |
| SSP245            | 2030_2060        | 0.2 ± 0.2        | 2.7 ± 2.2        | 17.4 ± 9.6        | 8.8 ± 3.6        | <b>29.1 ± 10.49</b> | 69.4 ± 13.1       | 1.3 ± 0.9        |
| SSP245            | 2070_2100        | 0.2 ± 0.1        | 3.3 ± 3.5        | 18.3 ± 9.1        | 9.3 ± 4.6        | <b>31.1 ± 10.78</b> | 67.5 ± 14.7       | 1.3 ± 0.7        |
| SSP370            | 2030_2060        | 0.2 ± 0.1        | 2.2 ± 1.7        | 16.3 ± 5.5        | 8.8 ± 3.7        | <b>27.5 ± 6.84</b>  | 70.5 ± 8.9        | 1.9 ± 1.6        |
| SSP370            | 2070_2100        | 0.2 ± 0.1        | 3.3 ± 2.5        | 18.6 ± 7          | 8.7 ± 3.8        | <b>30.8 ± 8.35</b>  | 67.3 ± 10.8       | 1.8 ± 1.8        |
| SSP585            | 2030_2060        | 0.2 ± 0.1        | 3.1 ± 2.5        | 18.6 ± 9          | 9.2 ± 4.4        | <b>31.1 ± 10.33</b> | 67.6 ± 13.1       | 1.2 ± 0.8        |
| SSP585            | 2070_2100        | 0.6 ± 1          | 4.4 ± 3.8        | 19.6 ± 9.5        | 9.7 ± 3.9        | <b>34.3 ± 11</b>    | 64.4 ± 12.6       | 1.1 ± 0.7        |

# S13. Percent change of Aridity index in South America

## SOUTH-AMERICA

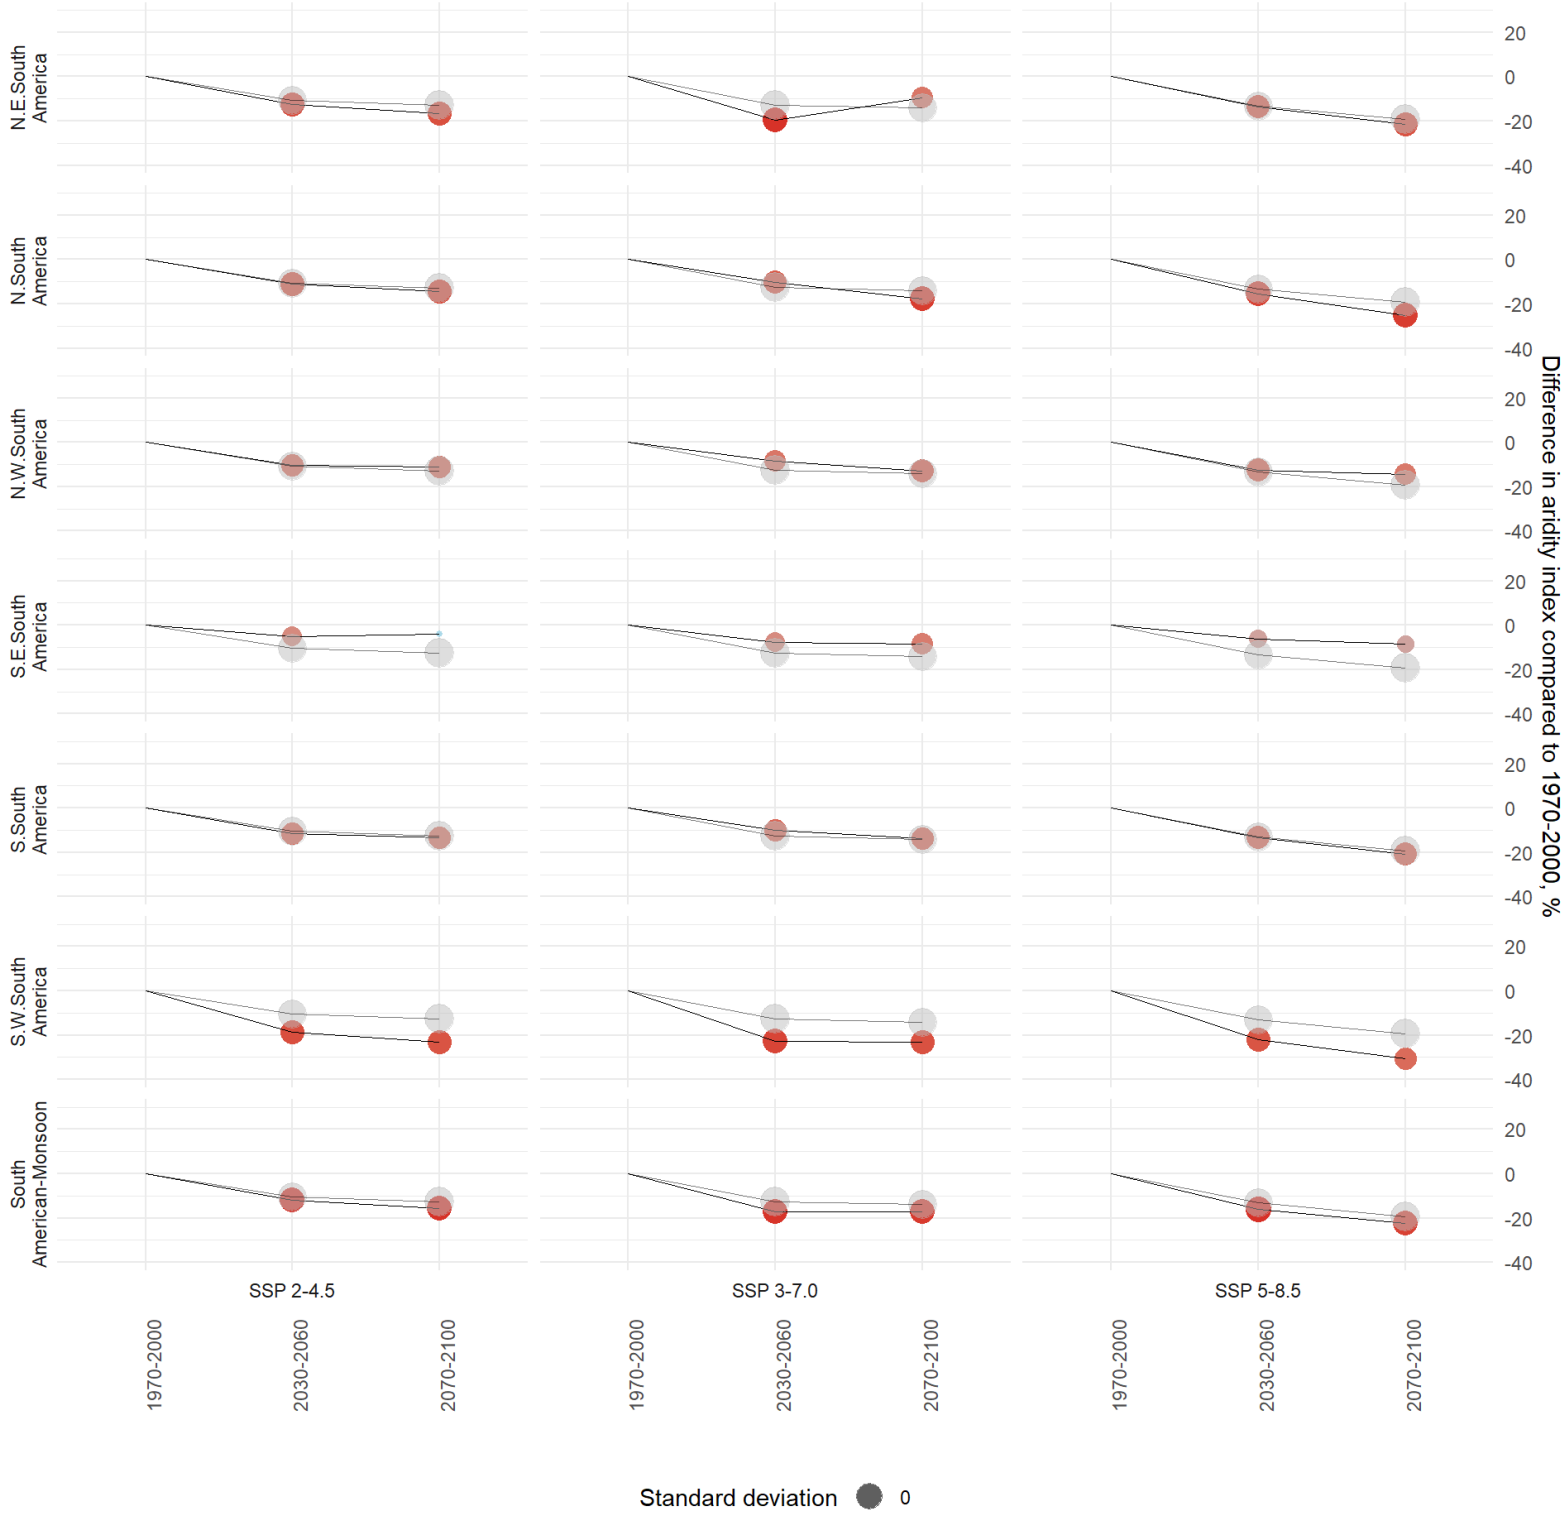

## T6. Proportion of aridity categories by period, model and continent

### EUROPE

| model             | period           | Hyperarid    | Arid           | Semi-Arid        | Dry subhumid     | Sum drylands       | Humid              | Cold               |
|-------------------|------------------|--------------|----------------|------------------|------------------|--------------------|--------------------|--------------------|
| historical        | 1850_1880        | 0 ± 0        | 1.9 ± 1.2      | 9.6 ± 4.1        | 4.5 ± 2.8        | 16 ± 5.11          | 49 ± 15.3          | 34.8 ± 20.2        |
| <b>historical</b> | <b>1970_2000</b> | <b>0 ± 0</b> | <b>1.5 ± 1</b> | <b>8.9 ± 3.4</b> | <b>3.9 ± 2.1</b> | <b>14.3 ± 4.12</b> | <b>44.9 ± 16.1</b> | <b>40.6 ± 20.4</b> |
| historical        | 1985_2015        | 0 ± 0        | 1.3 ± 1        | 8.4 ± 2.9        | 3.8 ± 2          | 13.5 ± 3.66        | 46 ± 16.1          | 40.3 ± 19.9        |
| SSP245            | 2030_2060        | 0 ± 0        | 1.9 ± 0.9      | 10.3 ± 3.6       | 5.1 ± 1.9        | 17.3 ± 4.17        | 52.7 ± 15.4        | 29.8 ± 19.7        |
| SSP245            | 2070_2100        | 0 ± 0        | 2.2 ± 1.1      | 10.1 ± 4.8       | 5.1 ± 2.3        | 17.4 ± 5.44        | 55.4 ± 14.4        | 27 ± 18.6          |
| SSP370            | 2030_2060        | 0 ± 0        | 2.1 ± 1        | 9.7 ± 4.7        | 4.8 ± 2.5        | 16.6 ± 5.42        | 52.7 ± 15.7        | 30.4 ± 20          |
| SSP370            | 2070_2100        | 0 ± 0        | 3.1 ± 1.1      | 11.4 ± 5.9       | 6.4 ± 3.8        | 20.9 ± 7.1         | 52.8 ± 14.3        | 26 ± 18.6          |
| SSP585            | 2030_2060        | 0 ± 0        | 2.3 ± 1.1      | 10.5 ± 3.7       | 4.9 ± 2.4        | 17.7 ± 4.55        | 55.2 ± 15.8        | 26.9 ± 19.9        |
| SSP585            | 2070_2100        | 0 ± 0        | 3 ± 1.7        | 11.1 ± 5.4       | 6.1 ± 2.9        | 20.2 ± 6.36        | 57.2 ± 12.8        | 22.5 ± 17.3        |

# S14. Percent change of Aridity index in Europe

## EUROPE

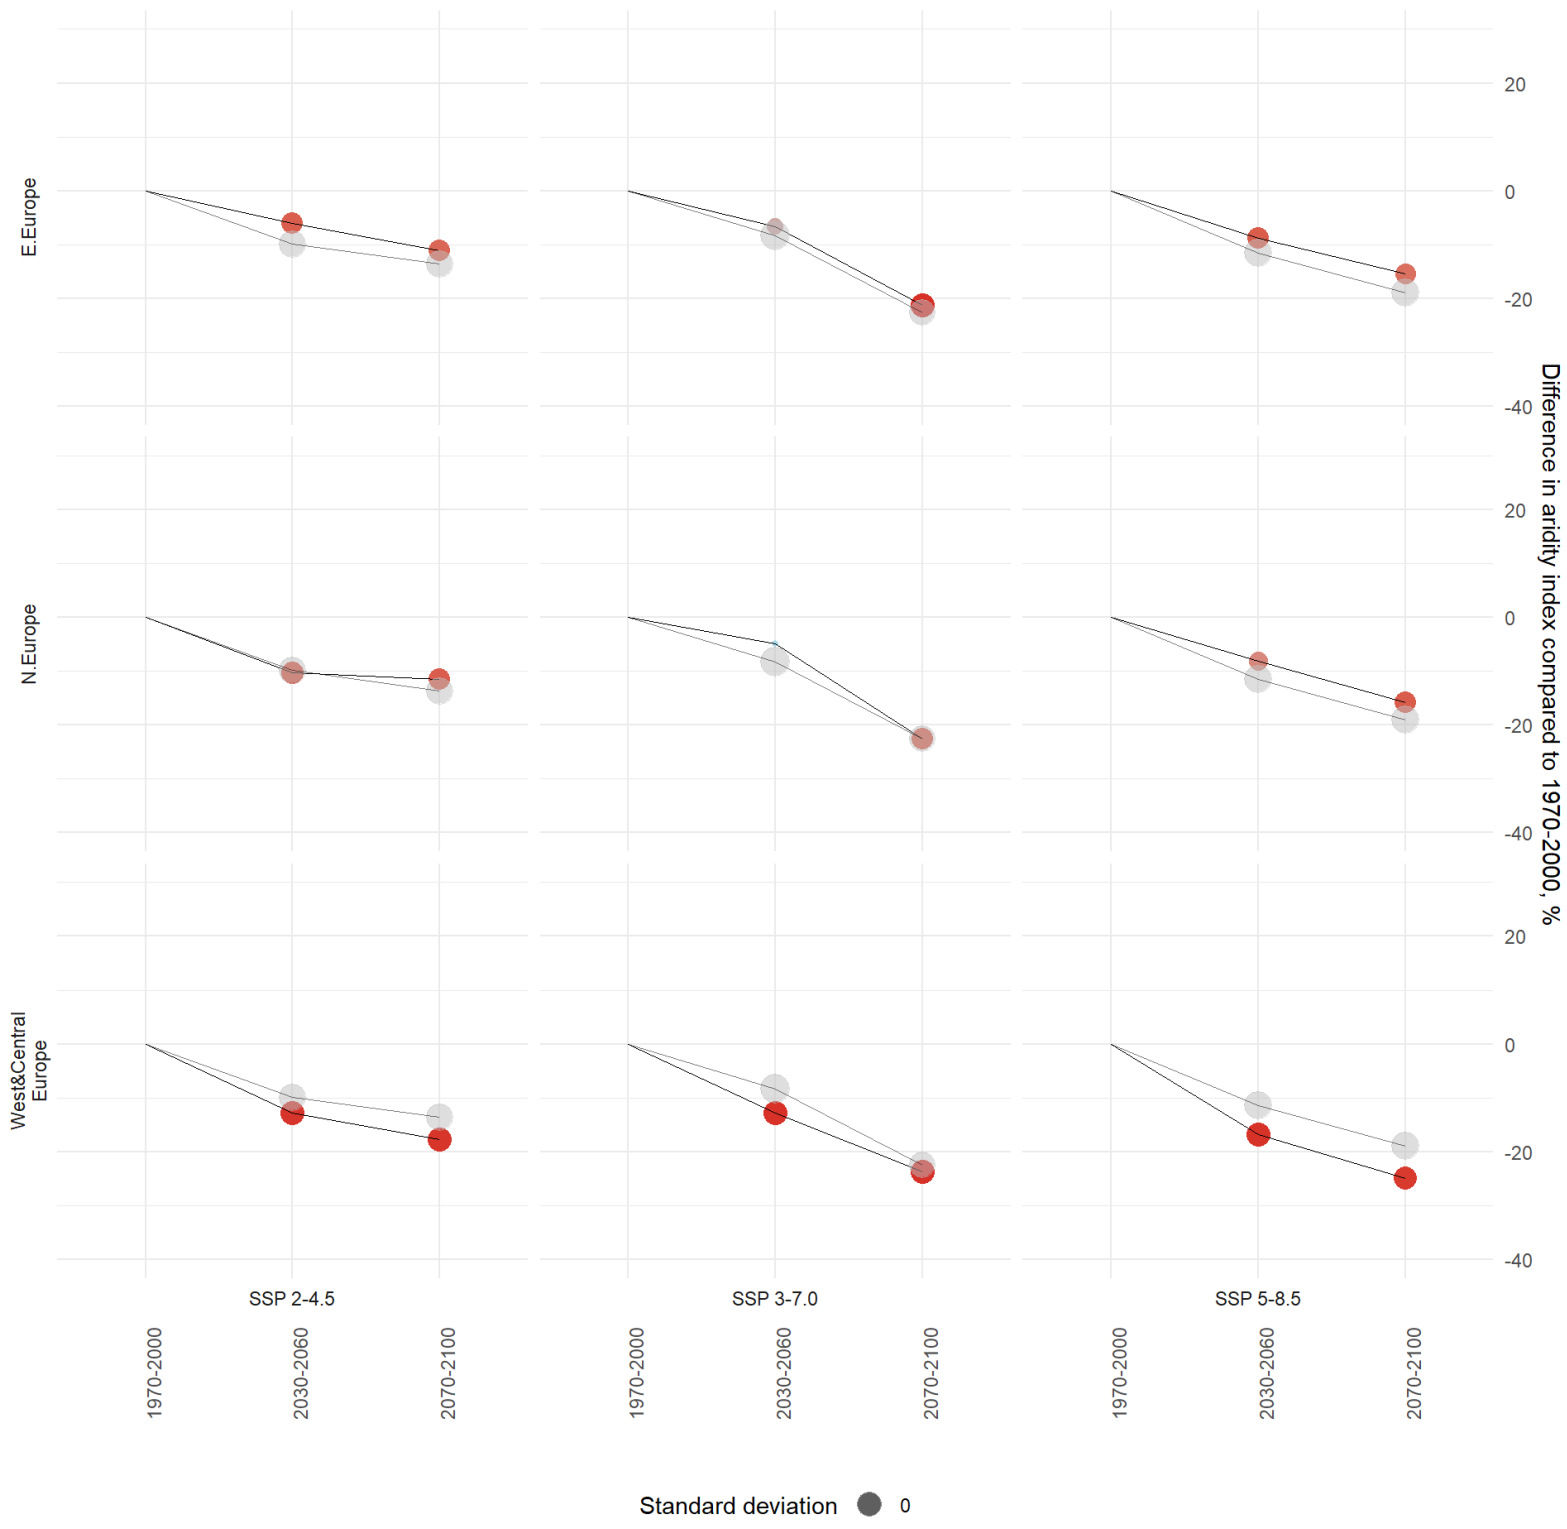

# T7. Proportion of aridity categories by period, model and continent

## MEDITERRANEAN BASIN

| model             | period           | Hyperarid      | Arid              | Semi-Arid          | Dry subhumid     | Sum drylands        | Humid              | Cold             |
|-------------------|------------------|----------------|-------------------|--------------------|------------------|---------------------|--------------------|------------------|
| historical        | 1850_1880        | 5.9 ± 4.9      | 23.6 ± 7          | 21.3 ± 8.8         | 8.8 ± 3.3        | 59.6 ± 12.7         | 24.9 ± 14.2        | 14.5 ± 0         |
| <b>historical</b> | <b>1970_2000</b> | <b>7 ± 5.5</b> | <b>26.5 ± 7.5</b> | <b>23.3 ± 10.3</b> | <b>9.9 ± 3.2</b> | <b>66.7 ± 14.24</b> | <b>27.5 ± 16.5</b> | <b>4.5 ± 7.5</b> |
| historical        | 1985_2015        | 7.1 ± 5.9      | 26.3 ± 7.1        | 22.2 ± 7.7         | 10.3 ± 4.2       | 65.9 ± 12.73        | 27.8 ± 14.3        | 5.2 ± 7          |
| SSP245            | 2030_2060        | 9.9 ± 6.6      | 28.9 ± 8.6        | 26.7 ± 8.9         | 9.4 ± 3.4        | 74.9 ± 14.43        | 23.1 ± 16.2        | 0.9 ± 0          |
| SSP245            | 2070_2100        | 11.7 ± 5.7     | 28.6 ± 8.8        | 27.2 ± 8.1         | 9.5 ± 3.1        | 77 ± 13.61          | 21.9 ± 13.9        | 0 ± 0            |
| SSP370            | 2030_2060        | 10.3 ± 6.3     | 28.2 ± 8.4        | 26 ± 8.7           | 9 ± 2.8          | 73.5 ± 13.92        | 24.8 ± 14          | 0.5 ± 0          |
| SSP370            | 2070_2100        | 13.2 ± 6.2     | 27.3 ± 8.6        | 28.3 ± 9.7         | 8.7 ± 3.6        | 77.5 ± 14.81        | 21.2 ± 16.2        | 0 ± 0            |
| SSP585            | 2030_2060        | 11.1 ± 6.4     | 28.8 ± 8.3        | 27.5 ± 8.8         | 8.7 ± 3          | 76.1 ± 14.01        | 22.6 ± 14.1        | 0.2 ± 0          |
| SSP585            | 2070_2100        | 15.2 ± 5.7     | 29.1 ± 10.1       | 27.9 ± 8.8         | 8 ± 2.8          | 80.2 ± 14.82        | 18.6 ± 13.6        | 0 ± 0            |

# S15. Percent change of Aridity index in Europe

## AFRICA

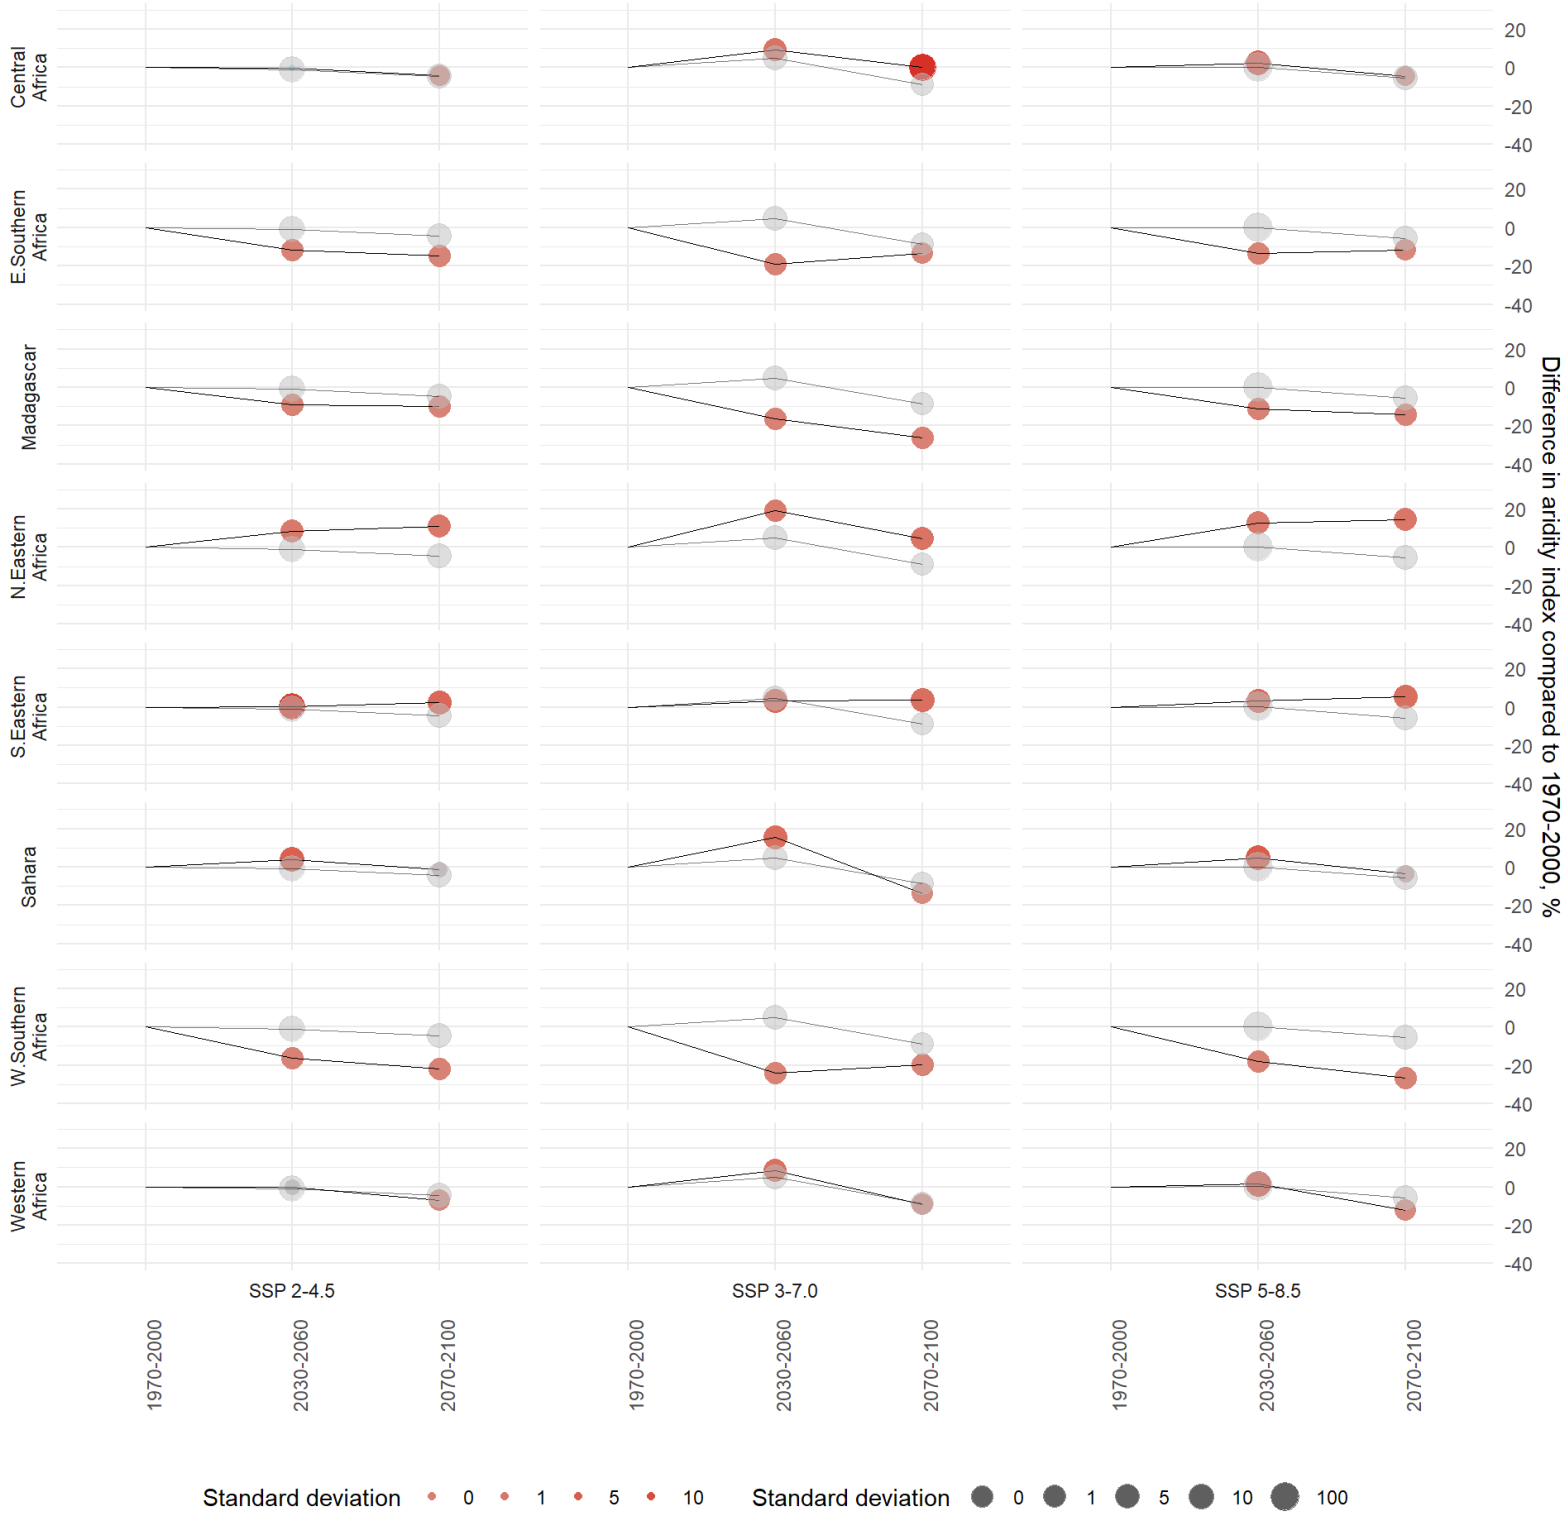

# T9. Proportion of aridity categories by period, model and continent

## ASIA

| model             | period           | Hyperarid        | Arid            | Semi-Arid        | Dry subhumid     | Sum drylands       | Humid             | Cold              |
|-------------------|------------------|------------------|-----------------|------------------|------------------|--------------------|-------------------|-------------------|
| historical        | 1850_1880        | 3.9 ± 2.3        | 12.2 ± 1.9      | 9.2 ± 1.5        | 4 ± 1.4          | <b>29.3 ± 3.62</b> | 32.4 ± 7.7        | 38 ± 9.2          |
| <b>historical</b> | <b>1970_2000</b> | <b>3.8 ± 2.1</b> | <b>12 ± 1.8</b> | <b>8.9 ± 1.5</b> | <b>3.8 ± 1.1</b> | <b>28.5 ± 3.33</b> | <b>30.7 ± 8.5</b> | <b>40.5 ± 9.6</b> |
| historical        | 1985_2015        | 3.7 ± 2.2        | 11.8 ± 1.6      | 8.6 ± 1.5        | 3.7 ± 1.1        | <b>27.8 ± 3.3</b>  | 30.1 ± 7.6        | 41.8 ± 8.8        |
| SSP245            | 2030_2060        | 3.5 ± 1.8        | 12.5 ± 1.6      | 9.4 ± 1.6        | 4.3 ± 1.7        | <b>29.7 ± 3.35</b> | 34.3 ± 8.1        | 35.8 ± 9.2        |
| SSP245            | 2070_2100        | 3.7 ± 2          | 12.5 ± 1.7      | 9.5 ± 1.7        | 4.2 ± 1.7        | <b>29.9 ± 3.56</b> | 36.2 ± 8.6        | 33.7 ± 9.3        |
| SSP370            | 2030_2060        | 3.4 ± 2.3        | 12.4 ± 1.5      | 8.9 ± 1.7        | 3.7 ± 1.3        | <b>28.4 ± 3.48</b> | 34 ± 7.2          | 37.3 ± 9.5        |
| SSP370            | 2070_2100        | 4.6 ± 1.9        | 12.5 ± 1.5      | 9.6 ± 1.5        | 3.8 ± 1.2        | <b>30.5 ± 3.09</b> | 35.2 ± 9.2        | 34.1 ± 9.7        |
| SSP585            | 2030_2060        | 3.8 ± 2          | 12.5 ± 1.6      | 9.5 ± 1.8        | 4.2 ± 1.6        | <b>30 ± 3.52</b>   | 35.4 ± 8.4        | 34.4 ± 9.3        |
| SSP585            | 2070_2100        | 4.8 ± 3.2        | 13.1 ± 3.2      | 10.4 ± 3.4       | 4.2 ± 1.5        | <b>32.5 ± 5.86</b> | 36.5 ± 11.7       | 30.7 ± 9.9        |

# S16. Percent change of Aridity index in Asia

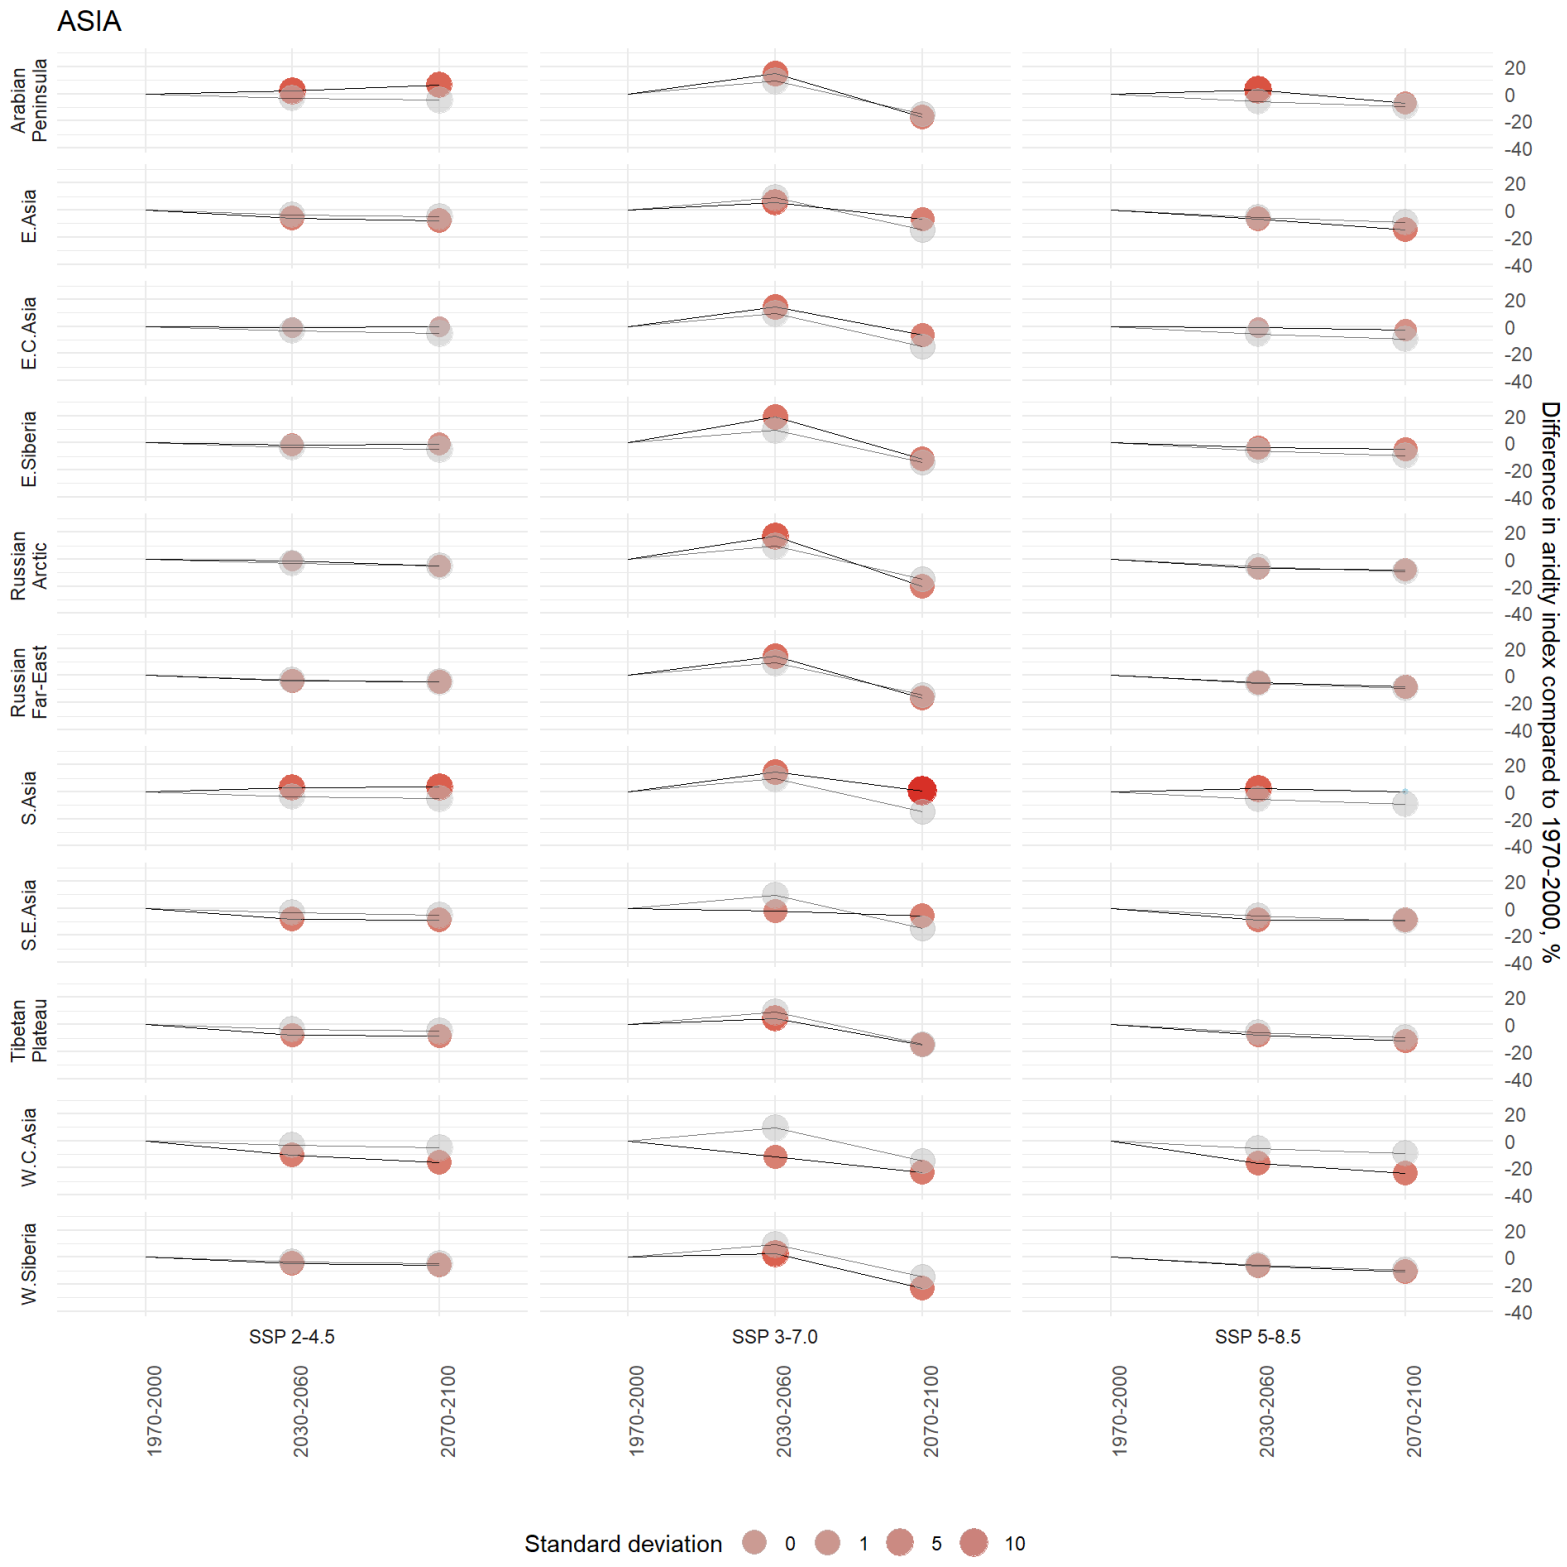



# T10. Proportion of aridity categories by period, model and continent

## OCEANIA

| model             | period           | Hyperarid      | Arid               | Semi-Arid          | Dry subhumid     | Sum drylands        | Humid              | Cold             |
|-------------------|------------------|----------------|--------------------|--------------------|------------------|---------------------|--------------------|------------------|
| historical        | 1850_1880        | 5.3 ± 0        | 32 ± 26            | 36.7 ± 17.1        | 6.6 ± 3.1        | 80.6 ± 31.27        | 18.9 ± 12.5        | 0.3 ± 0.2        |
| <b>historical</b> | <b>1970_2000</b> | <b>5.2 ± 0</b> | <b>31.3 ± 26.4</b> | <b>36.8 ± 17.4</b> | <b>6.8 ± 3.1</b> | <b>80.1 ± 31.77</b> | <b>19.3 ± 12.8</b> | <b>0.5 ± 0.4</b> |
| historical        | 1985_2015        | 5.2 ± 0        | 33.4 ± 26.1        | 35.5 ± 17.9        | 6.8 ± 3.2        | 80.9 ± 31.81        | 18.4 ± 12.3        | 0.6 ± 0.3        |
| SSP245            | 2030_2060        | 10.4 ± 0       | 35.8 ± 23.5        | 31.7 ± 15.1        | 5.7 ± 2.6        | 83.6 ± 28.05        | 15.9 ± 11.9        | 0.3 ± 0.3        |
| SSP245            | 2070_2100        | 10.5 ± 0       | 37.9 ± 22.2        | 29.1 ± 13.1        | 6.2 ± 3.3        | 83.7 ± 25.99        | 16.2 ± 12          | 0.1 ± 0          |
| SSP370            | 2030_2060        | 10.7 ± 0       | 34.8 ± 22.6        | 33.4 ± 15.3        | 5.8 ± 2.5        | 84.7 ± 27.41        | 14.9 ± 8.1         | 0.3 ± 0.2        |
| SSP370            | 2070_2100        | 10.5 ± 10.2    | 38.1 ± 19.7        | 28.5 ± 13.8        | 5.7 ± 3.2        | 82.8 ± 26.32        | 16.8 ± 16.3        | 0.3 ± 0.3        |
| SSP585            | 2030_2060        | 5.6 ± 3.6      | 35.6 ± 25.3        | 33.8 ± 16.7        | 6.7 ± 3.6        | 81.7 ± 30.74        | 17.7 ± 13.8        | 0.3 ± 0.3        |
| SSP585            | 2070_2100        | 9.3 ± 6.4      | 39.4 ± 21.7        | 29.4 ± 12.9        | 5.5 ± 2.5        | 83.6 ± 26.16        | 16.2 ± 12.5        | 0 ± 0            |

# S17. Percent change of Aridity index in Oceania

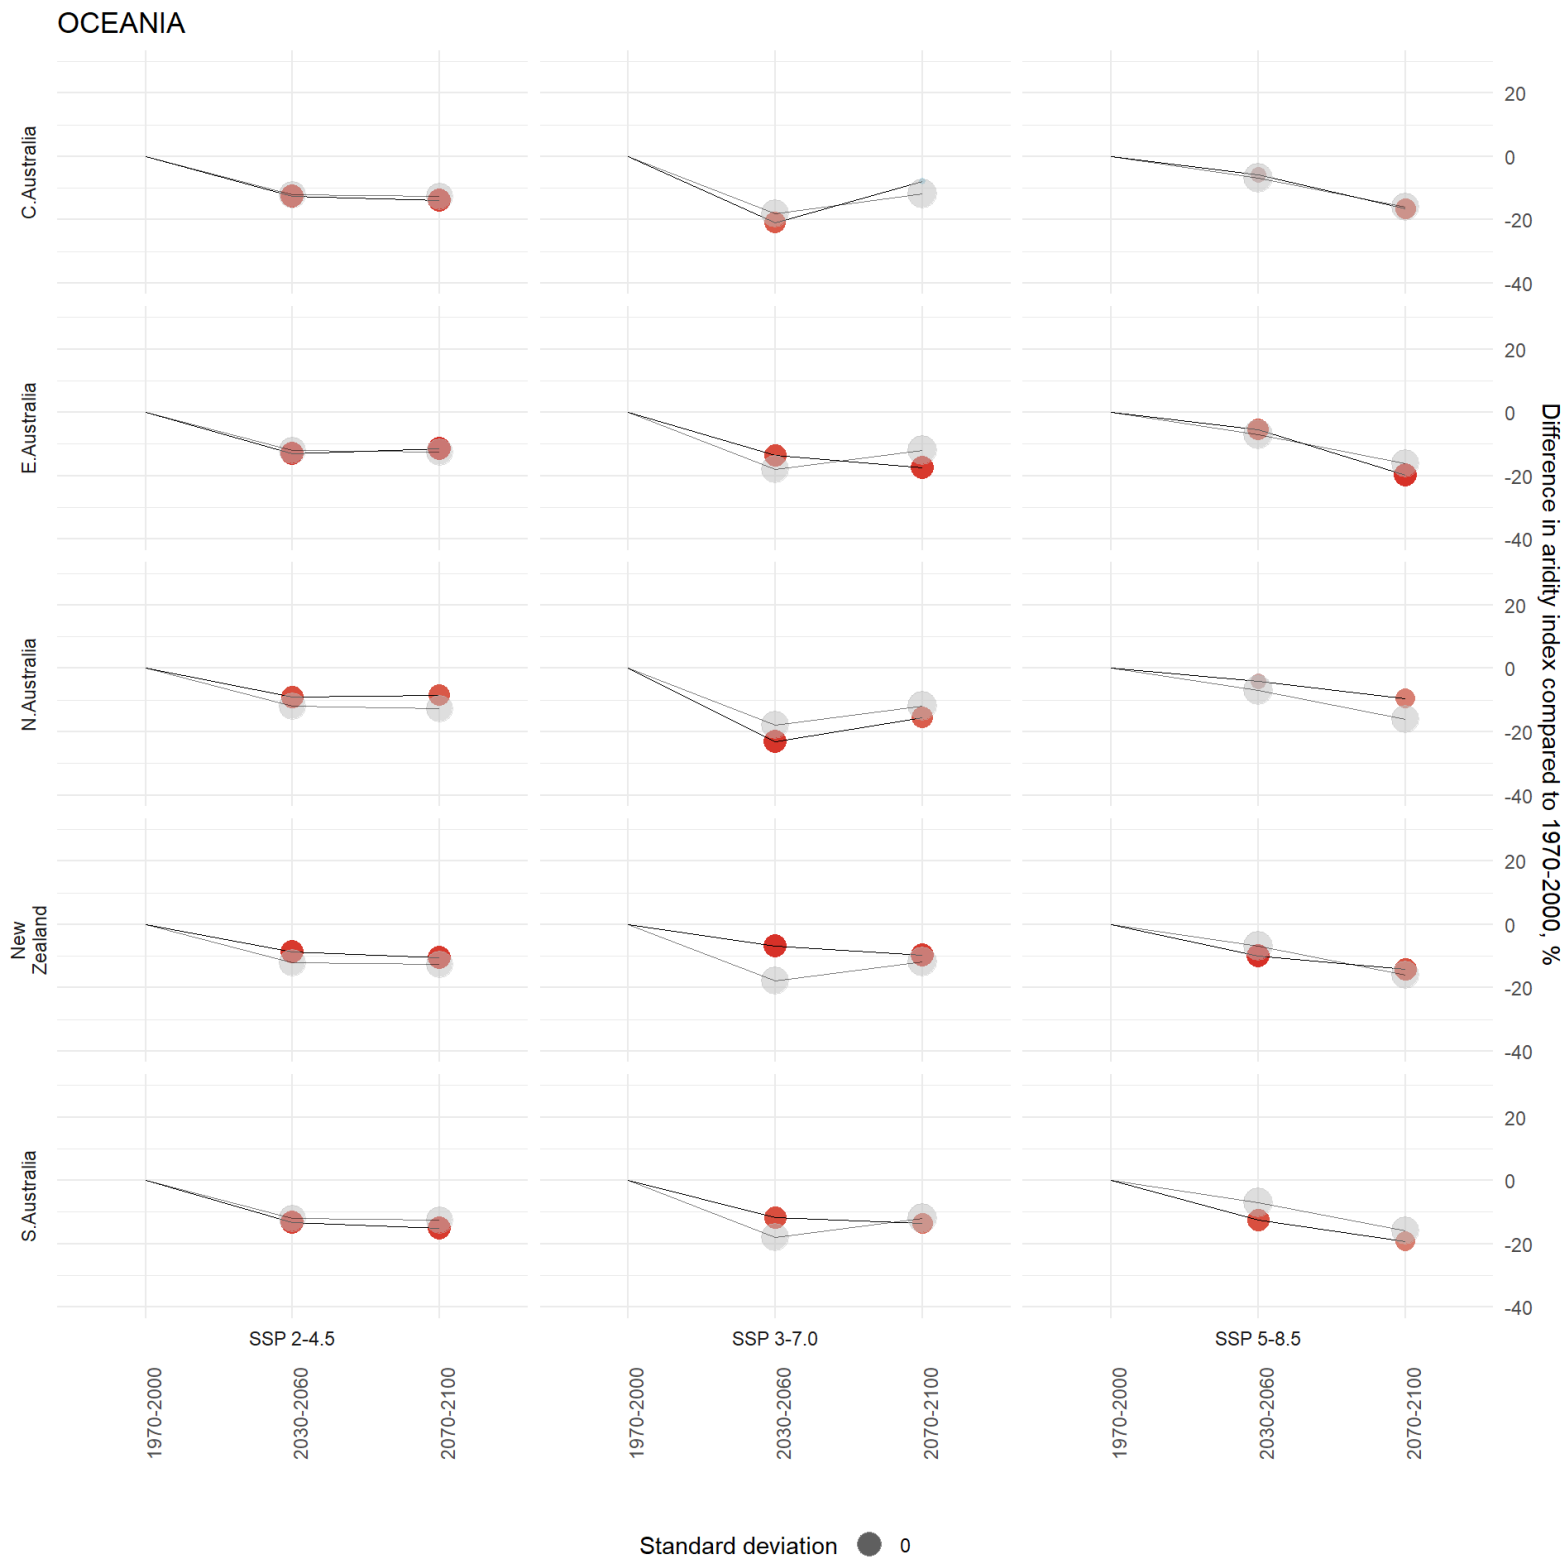

# S17. AI changes when using Thornthwaite aridity index

SSP245 , 2030\_2060

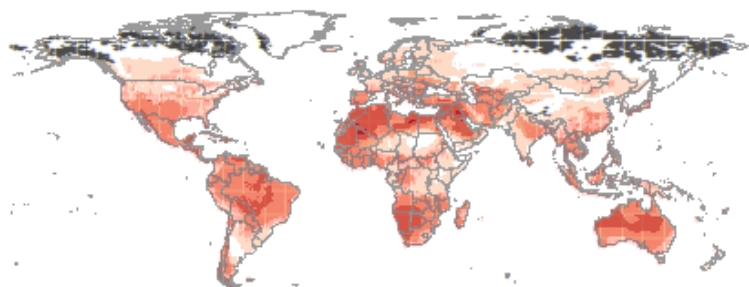

SSP245 , 2070\_2100

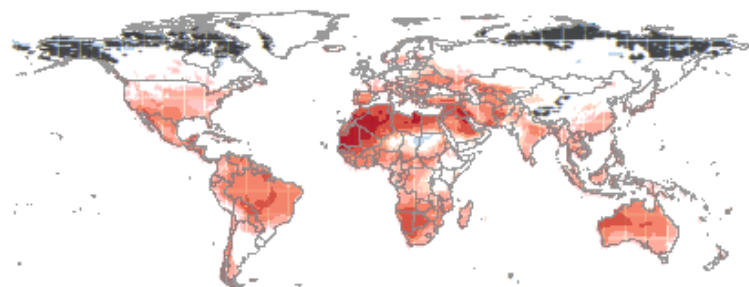

SSP370 , 2030\_2060

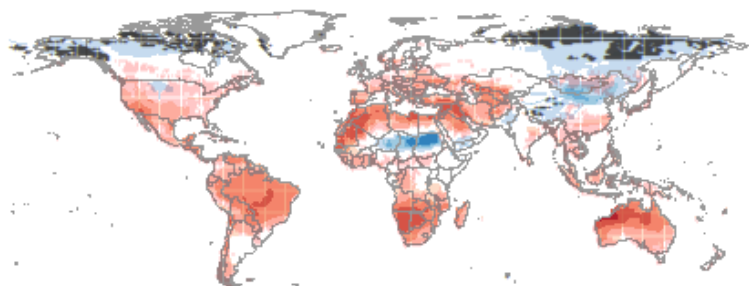

SSP370 , 2070\_2100

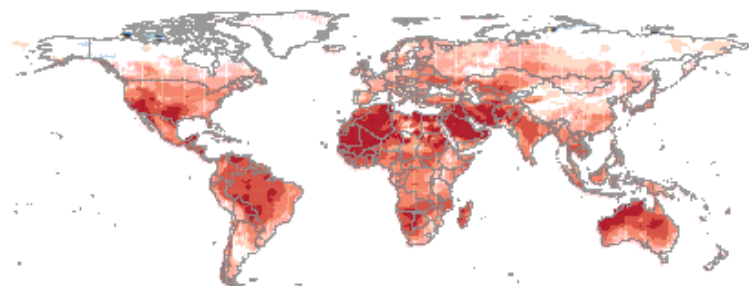

SSP585 , 2030\_2060

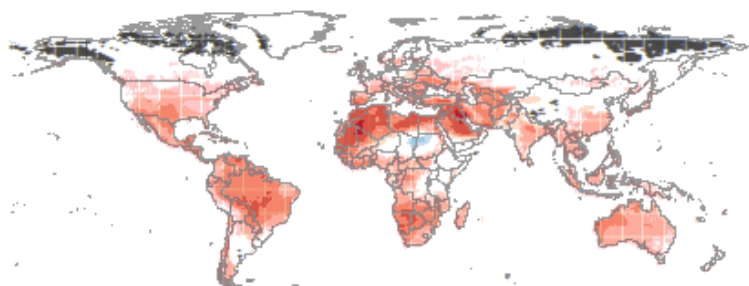

SSP585 , 2070\_2100

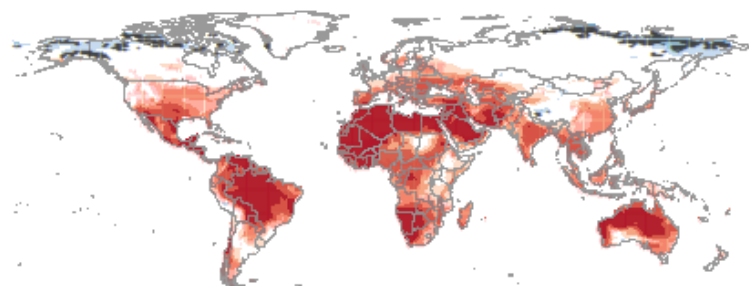

% change of AI index  
compared to 1970-2000

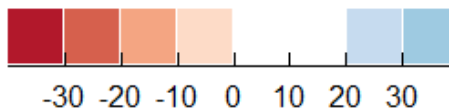

Supplement: Supplementary file 1 [file egusphere-2024-3710-supplement.pdf]
